# Supplementary material for: Pyrene bridged double[7]helicene embedded with a heptagonal ring
Source: Royal Society of Chemistry journal article supplement (doi:10.1039/d3qo00386h), 2023-01-01
Supplement: d3qo00386h1.pdf [file d3qo00386h1.pdf]

# Supporting Information for

## Pyrene Bridged Double [7]helicene Embedded With a Heptagonal Ring

Asim Swain,<sup>1</sup> Prince Ravat<sup>1,\*</sup>

<sup>1</sup>Julius-Maximilians-Universität Würzburg, Institut für Organische Chemie, Am Hubland, D-97074 Würzburg, Germany.

\*Email: princekumar.ravat@uni-wuerzburg.de

### Table of Contents

|                                                            |     |
|------------------------------------------------------------|-----|
| S1. Experimental Details.....                              | S2  |
| S2. Photophysical Properties.....                          | S3  |
| S3. Chiral stationary phase HPLC data.....                 | S4  |
| S4. Quantum chemical calculations .....                    | S5  |
| S5. NMR spectra .....                                      | S11 |
| S6. High resolution mass spectrometry (HRMS) spectra ..... | S18 |
| S7. Cartesian coordinates .....                            | S21 |
| S8. References .....                                       | S29 |

## S1. Experimental Details

**Chromatography.** Open-column chromatography and thin-layer chromatography (TLC) were performed on silica gel (Merck silica gel 100-200 mesh). Chiral stationary phase HPLC separations were performed on SHIMADZU 223.

**NMR Spectroscopy.** The NMR measurements were performed at 298 K on NMR spectrometers operating at 400 MHz  $^1\text{H}$  and 101 MHz  $^{13}\text{C}$  frequencies (151 MHz for (*P, M-3*)). Standard pulse sequences were used, and the data was processed using 2-fold zero-filling in the indirect dimension for all 2D experiments. Chemical shifts ( $\delta$ ) are reported in parts per million (ppm) relative to the solvent residual peak ( $^1\text{H}$  and  $^{13}\text{C}$  NMR, respectively):  $\text{CD}_2\text{Cl}_2$  ( $\delta = 5.32$  and 53.84 ppm) and *J* values are given in Hz.

**High-resolution mass spectrometry (HRMS).** The matrix-assisted laser desorption ionization-time of flight (MALDI-TOF) - HRMS were measured on Bruker ultrafleXtreme. *Trans-2-[3-(4-tert-butylphenyl)-2-methyl-2-propenylidene]malononitrile* (DCTB) dissolved in chloroform (30 mg/mL) was used as a supporting matrix, while Cesium iodide dissolved in acetonitrile (40 mg/mL) used as a reference in the MALDI-TOF–HRMS measurement. The calculated mass was exported from mMass software.<sup>1</sup>

**Melting point.** Melting points were measured using an OptiMelt Automated Melting Point System.

**UV–vis and Fluorescence spectroscopy.** UV–vis spectra were measured on the JASCO V-670 spectrometer, while emission spectra were measured Edinburgh FLS 980 photoluminescence spectrometer in DCM (OD = 0.05). The fluorescence lifetimes were measured in DCM (OD = 0.05) using a 418.6 nm pulsed laser diode with a pulse frequency of 1/50 ns. The fluorescence quantum yields were measured in DCM in three different concentrations (OD = 0.2 – 0.5) using the same spectrometer with a 450 W xenon arc lamp as a light source and a calibrated integrating sphere.

**CPL and CD spectroscopy.** CPL and CD spectra were recorded with a customized JASCO CPL-300/J-1500 hybrid spectrometer.

## S2. Photophysical Properties

### A. Comparison of UV-vis absorption, emission, and CD plots in DCM.

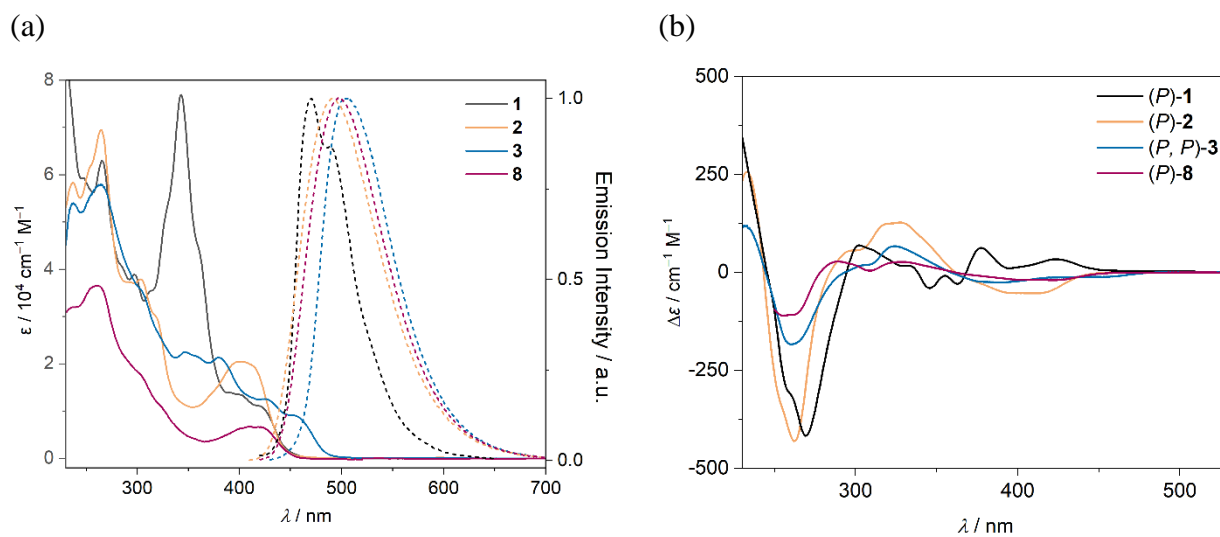

**Figure S1.** (a) UV-vis absorption and emission spectra of **1**, **2**, **3**, and **8** in dichloromethane.

(b) Electronic CD spectra of **1**, **2**, **3**, and **8** in dichloromethane.

### B. Solid state emission and CPL spectra.

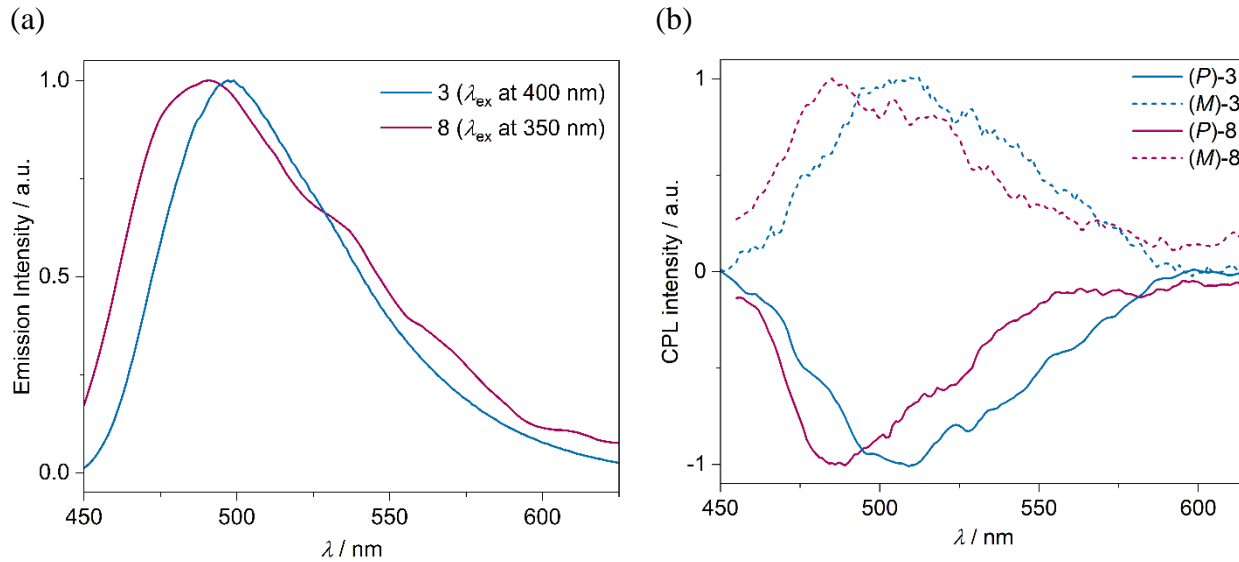

**Figure S2.** Solid state (a) emission spectra and (b) CPL spectra of **3** and **8** (excited at 380 nm).

### S3. Chiral stationary phase HPLC data

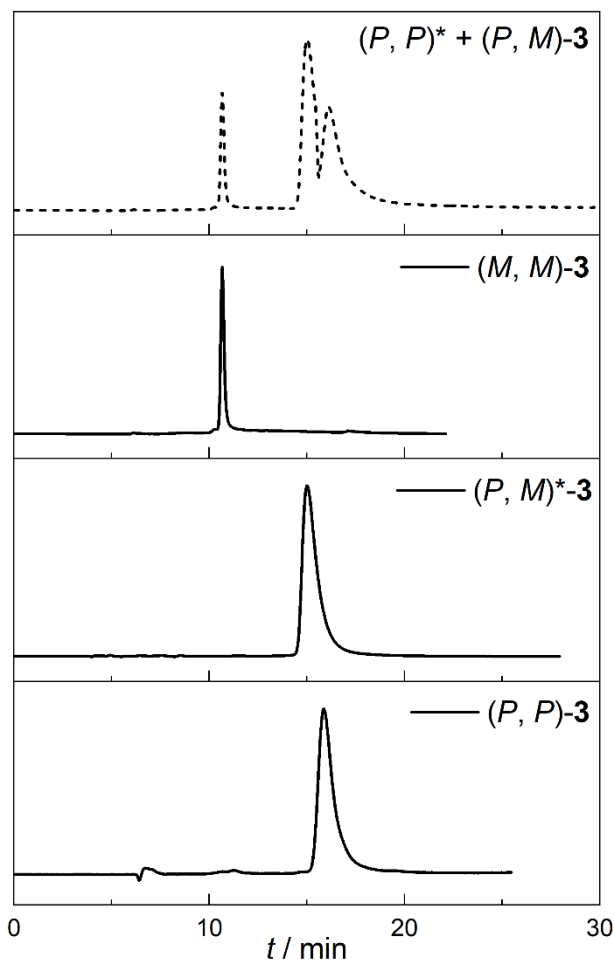

**Figure S3.** HPLC chromatogram of diastereomeric mixture of **3** using chiral stationary phase column. (The chromatogram detector was set at 375 nm with a bandwidth of 4 nm.)

**Table S1.** Overview of parameters for HPLC separation of stereoisomers of **3**.

| Compound | Eluent<br><i>n</i> -hexane/ <i>i</i> PrOH | First fraction | Second fraction | Third fraction | $\alpha^b$ | $R_s^c$ | <i>er</i> |
|----------|-------------------------------------------|----------------|-----------------|----------------|------------|---------|-----------|
| <b>3</b> | 94:6                                      | <i>MM</i>      | <i>PM*</i>      | <i>PP</i>      | 1.36       | 2.48    | 98:2      |

<sup>a</sup>Phenomenex Lux i-Amylose-3, 5  $\mu$ m (250 x 4.6 mm). Sample injection: 30  $\mu$ L of a ~1 mg/mL solution in hexane/*i*PrOH. Separation conditions: Eluent, flow rate: 0.5 mL/min, 25  $^{\circ}$ C. <sup>b</sup>Selectivity parameter:  $\alpha = t_{R2}/t_{R1}$ , where  $t_{R1}$ , and  $t_{R2}$  are elution times for first and second fraction, respectively. <sup>c</sup>Resolution parameter:  $R_s = 2(t_{R2} - t_{R1})/(w_1 + w_2)$ , where  $w_1$  and  $w_2$  are peak widths for first and second fraction, respectively. Note  $\alpha$  and  $R_s$  for **3** was calculated only for *PP* and *MM*.

## S4. Quantum chemical calculations

DFT calculations were performed using Gaussian 16 suite.<sup>2</sup> Geometries were optimized using  $\omega$ B97XD functional and 6-31G(d,p) basis set in the gas phase. Frequency analysis was performed to verify the stationary state geometry. In all cases no imaginary frequency was found. TD-DFT calculations were performed on  $\omega$ B97XD/6-31G(d,p) optimized geometries at the B3LYP/6-31g(d,p) level. The effect of the solvent was accounted for using PCM (with dichloromethane as the solvent). SpecDis<sup>3</sup> and Avogadro<sup>4</sup> software were used to analyze the TD-DFT calculated spectra and to generate graphical images of frontier molecular orbitals (FMOs), respectively.

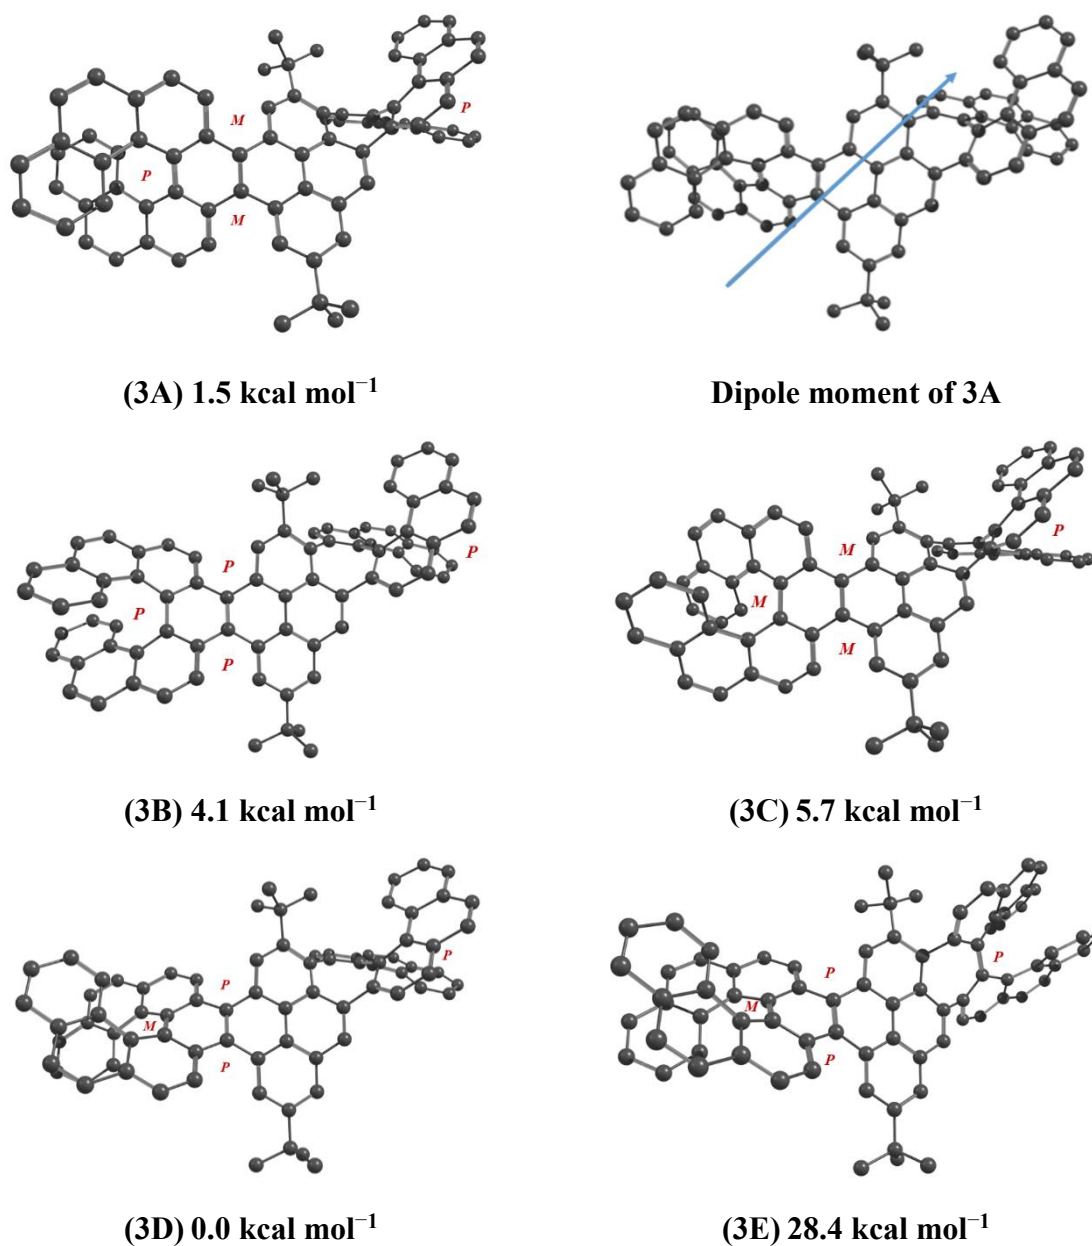

**Figure S4.** Relative Gibbs's free energies and optimized geometries of diastereomers of **3**. Hydrogen atoms are omitted for clarity.

**Table S2.** Frontier molecular orbitals of (*P, P*)-**3** and (*P, M*)-**3** (isosurface value 0.02). Hydrogen atoms are omitted for clarity.

| FMOs   | ( <i>P, P</i> )- <b>3A</b>                                                          | ( <i>P, M</i> )- <b>3C</b>                                                           |
|--------|-------------------------------------------------------------------------------------|--------------------------------------------------------------------------------------|
| LUMO+1 | 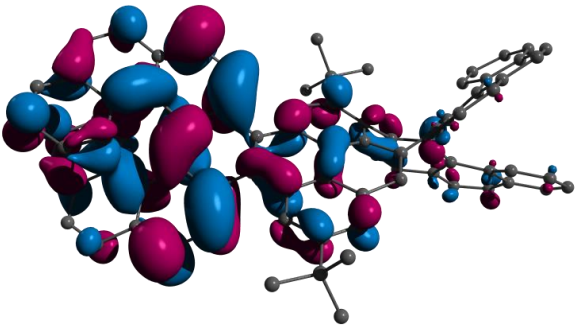   |    |
| LUMO   |   |   |
| HOMO   |  |  |
| HOMO-1 |  |  |

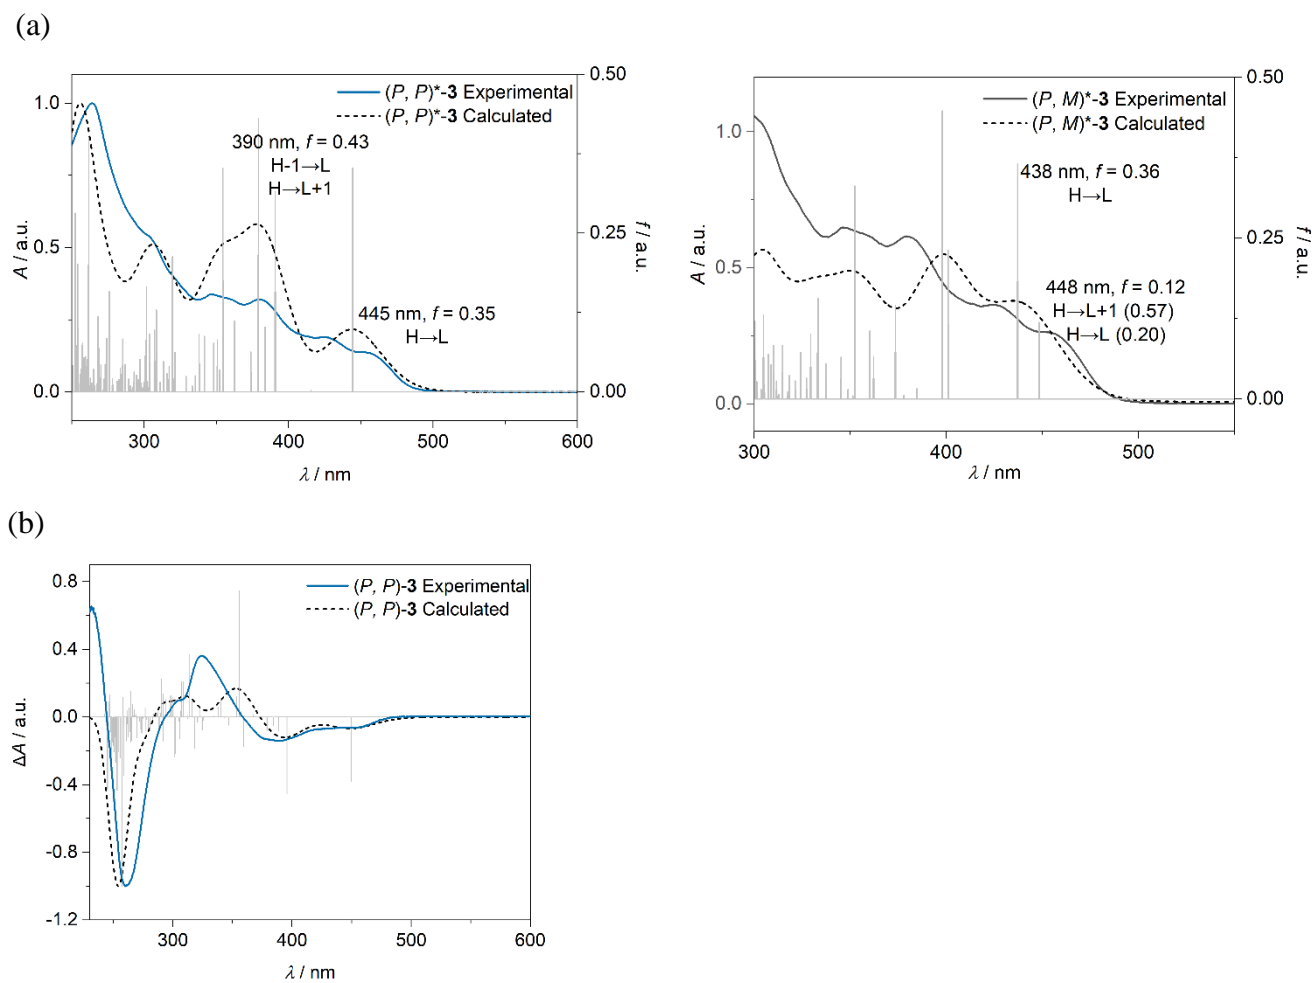

**Figure S5.** Comparison of experimental (solid) and TD-DFT calculated (dashed) (a) UV-vis absorption (b) ECD spectra of  $(P, P)-3$  (shifted by 0.07 eV, 10 nm) and  $(P, M)^*-3$  (shifted by 0.04 eV, 15 nm) along with assignments of key transitions. H = HOMO, L = LUMO,  $f$  = oscillator strength.

**Table S3a.** Summary of TD-DFT calculated key transitions of (*P*, *P*)-3.

| Excited singlet state | Wavelength / nm | Energy / eV | Major transitions | Contribution | oscillator strength ( <i>f</i> ) |
|-----------------------|-----------------|-------------|-------------------|--------------|----------------------------------|
| 1                     | 445             | 2.78        | HOMO→LUMO         | 0.69         | 0.35                             |
| 3                     | 390             | 3.18        | HOMO→LUMO+2       | 0.53         | 0.43                             |
|                       |                 |             | HOMO-1→LUMO       | 0.33         |                                  |
| 8                     | 359             | 3.45        | HOMO→LUMO+4       | 0.56         | 0.35                             |
|                       |                 |             | HOMO-3→LUMO       | 0.34         |                                  |

**Table S3b.** Summary of TD-DFT calculated key transitions of (*P*, *M*)-3.

| Excited singlet state | Wavelength / nm | Energy / eV | Major transitions | Contribution | oscillator strength ( <i>f</i> ) |
|-----------------------|-----------------|-------------|-------------------|--------------|----------------------------------|
| 1                     | 448             | 2.76        | HOMO→LUMO+1       | 0.57         | 0.12                             |
|                       |                 |             | HOMO→LUMO         | 0.20         |                                  |
| 2                     | 438             | 2.83        | HOMO→LUMO         | 0.65         | 0.36                             |
| 4                     | 398             | 3.11        | HOMO-1→LUMO+1     | 0.49         | 0.45                             |



**NICS calculations:** The Nucleus Independent Chemical Shift (NICS) calculations were performed on  $\omega$ B97XD/6-31G(d,p) optimized geometry at GIAO-B3LYP/6-311+G(2d,p) level. Considering the non-planarity of molecule the NICS(1)<sub>zz</sub> values were obtained by placing dummy atom at 1 Å above and below the each ring.

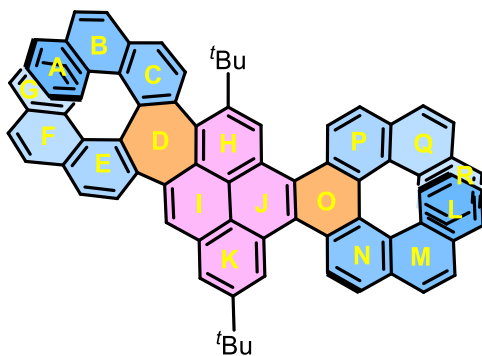

**Table S4.** The calculated NICS(0) and NICS(1)<sub>zz</sub> values for (P, P)-3.

| Ring     | NICS(1) <sub>zz</sub><br>(Up) | NICS(1) <sub>zz</sub><br>(Down) | NICS(0) <sub>zz</sub> | NICS(0) <sub>iso</sub> | Ring     | NICS(1) <sub>zz</sub><br>(Up) | NICS(1) <sub>zz</sub><br>(Down) | NICS(0) <sub>zz</sub> | NICS(0) <sub>iso</sub> |
|----------|-------------------------------|---------------------------------|-----------------------|------------------------|----------|-------------------------------|---------------------------------|-----------------------|------------------------|
| <b>A</b> | -12.28                        | -13.42                          | -9.75                 | -9.18                  | <b>J</b> | -4.16                         | -3.75                           | 18.57                 | 1.15                   |
| <b>B</b> | -10.49                        | -7.59                           | -7.69                 | -4.89                  | <b>K</b> | -26.23                        | -28.82                          | -10.78                | -8.73                  |
| <b>C</b> | -3.00                         | -3.64                           | -4.81                 | -6.50                  | <b>L</b> | -30.30                        | -33.08                          | -17.14                | -9.30                  |
| <b>D</b> | 11.05                         | 14.45                           | 21.30                 | 8.48                   | <b>M</b> | -21.17                        | -20.94                          | -6.54                 | -5.17                  |
| <b>E</b> | -7.50                         | -6.09                           | -5.99                 | -6.67                  | <b>N</b> | -15.95                        | -9.66                           | -4.73                 | -5.03                  |
| <b>F</b> | -9.04                         | -11.82                          | -6.81                 | -4.82                  | <b>O</b> | -6.31                         | -6.50                           | 6.15                  | -1.10                  |
| <b>G</b> | -15.08                        | -12.88                          | -9.32                 | -9.23                  | <b>P</b> | -10.26                        | -16.67                          | -4.79                 | -5.03                  |
| <b>H</b> | -28.71                        | -22.15                          | -9.52                 | -7.88                  | <b>Q</b> | -21.39                        | -21.66                          | -6.40                 | -5.23                  |
| <b>I</b> | -6.97                         | -13.54                          | 8.78                  | -1.63                  | <b>R</b> | -33.42                        | -30.53                          | -16.91                | -9.32                  |

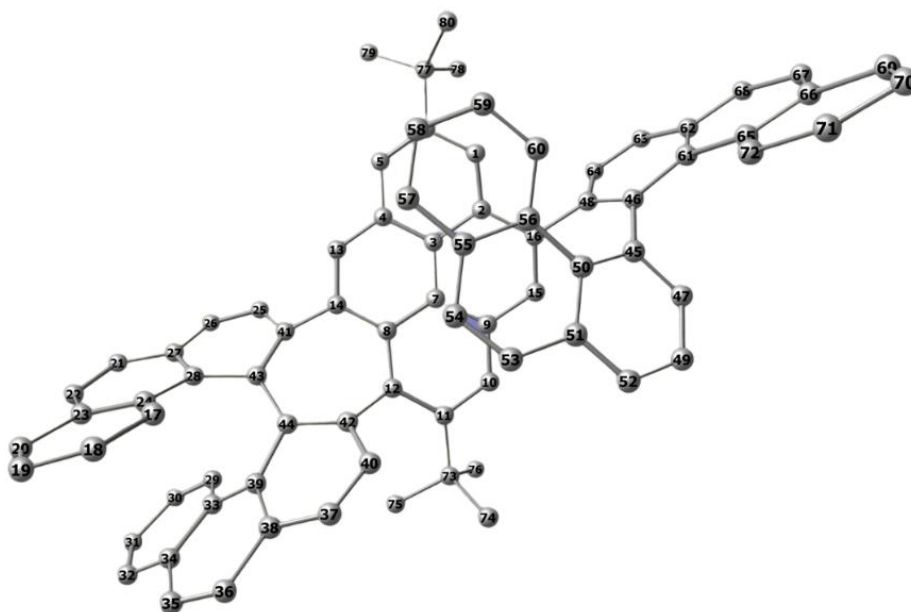

**Table S5.** Mulliken charges and spin densities for radical cation of **8**.

| Atom no. | Mulliken charges | Spin densities | Atom no. | Mulliken charges | Spin densities | Atom no. | Mulliken charges | Spin densities |
|----------|------------------|----------------|----------|------------------|----------------|----------|------------------|----------------|
| 1        | -0.163482        | 0.264863       | 26       | -0.146228        | 0.067297       | 51       | 0.067740         | -0.000944      |
| 2        | 0.108330         | -0.104373      | 27       | 0.086285         | -0.015958      | 52       | -0.167475        | 0.001073       |
| 3        | -0.006361        | 0.044216       | 28       | -0.032250        | 0.017031       | 53       | -0.150528        | 0.001419       |
| 4        | 0.106025         | -0.057983      | 29       | -0.132121        | -0.015118      | 54       | -0.142390        | 0.000910       |
| 5        | -0.189932        | 0.195718       | 30       | -0.125709        | 0.014679       | 55       | 0.075095         | 0.001266       |
| 6        | 0.138253         | -0.115557      | 31       | -0.123569        | -0.012248      | 56       | 0.026335         | -0.001290      |
| 7        | 0.007890         | -0.041204      | 32       | -0.156031        | 0.012179       | 57       | -0.167624        | 0.002457       |
| 8        | 0.072874         | 0.007984       | 33       | 0.037175         | 0.027447       | 58       | -0.120807        | -0.000823      |
| 9        | 0.107371         | 0.073733       | 34       | 0.079624         | -0.015933      | 59       | -0.134576        | 0.001511       |
| 10       | -0.167386        | 0.067456       | 35       | -0.129754        | 0.041661       | 60       | -0.133960        | 0.001937       |
| 11       | 0.078877         | -0.038924      | 36       | -0.153901        | -0.020690      | 61       | 0.020046         | -0.005642      |
| 12       | -0.050876        | 0.190418       | 37       | -0.143256        | 0.009807       | 62       | 0.076593         | 0.008120       |
| 13       | -0.202123        | 0.144692       | 38       | 0.084343         | 0.040544       | 63       | -0.162581        | -0.006486      |
| 14       | 0.035401         | 0.000081       | 39       | -0.042643        | -0.050226      | 64       | -0.164339        | 0.008810       |
| 15       | -0.167778        | -0.042328      | 40       | -0.120786        | 0.008774       | 65       | 0.031451         | 0.002949       |
| 16       | 0.000808         | 0.156844       | 41       | 0.010749         | 0.076786       | 66       | 0.068010         | -0.002468      |
| 17       | -0.132083        | 0.003815       | 42       | -0.014392        | 0.001654       | 67       | -0.141615        | 0.006084       |
| 18       | -0.126061        | -0.002488      | 43       | 0.005813         | -0.012079      | 68       | -0.157420        | -0.004168      |
| 19       | -0.124110        | 0.005056       | 44       | 0.025105         | 0.115327       | 69       | -0.162862        | 0.001673       |
| 20       | -0.156758        | -0.004181      | 45       | -0.082325        | 0.000686       | 70       | -0.121489        | -0.001602      |
| 21       | -0.152639        | 0.008820       | 46       | -0.042610        | 0.013987       | 71       | -0.140683        | 0.001625       |
| 22       | -0.132695        | -0.002825      | 47       | -0.113216        | 0.000334       | 72       | -0.122927        | -0.001429      |
| 23       | 0.078908         | 0.006681       | 48       | 0.013668         | -0.015999      | 73       | -0.056146        | 0.002043       |
| 24       | 0.033430         | -0.001935      | 49       | -0.133005        | 0.000600       | 74       | -0.337779        | 0.000622       |
| 25       | -0.159308        | -0.038487      | 50       | 0.029218         | 0.003147       | 75       | -0.346806        | 0.000192       |
| 76       | -0.344055        | -0.000681      | 78       | -0.345135        | -0.001746      | 80       | -0.339585        | -0.001888      |
| 77       | -0.074939        | 0.006345       | 79       | -0.360332        | -0.000012      |          |                  |                |

## S5. NMR spectroscopy

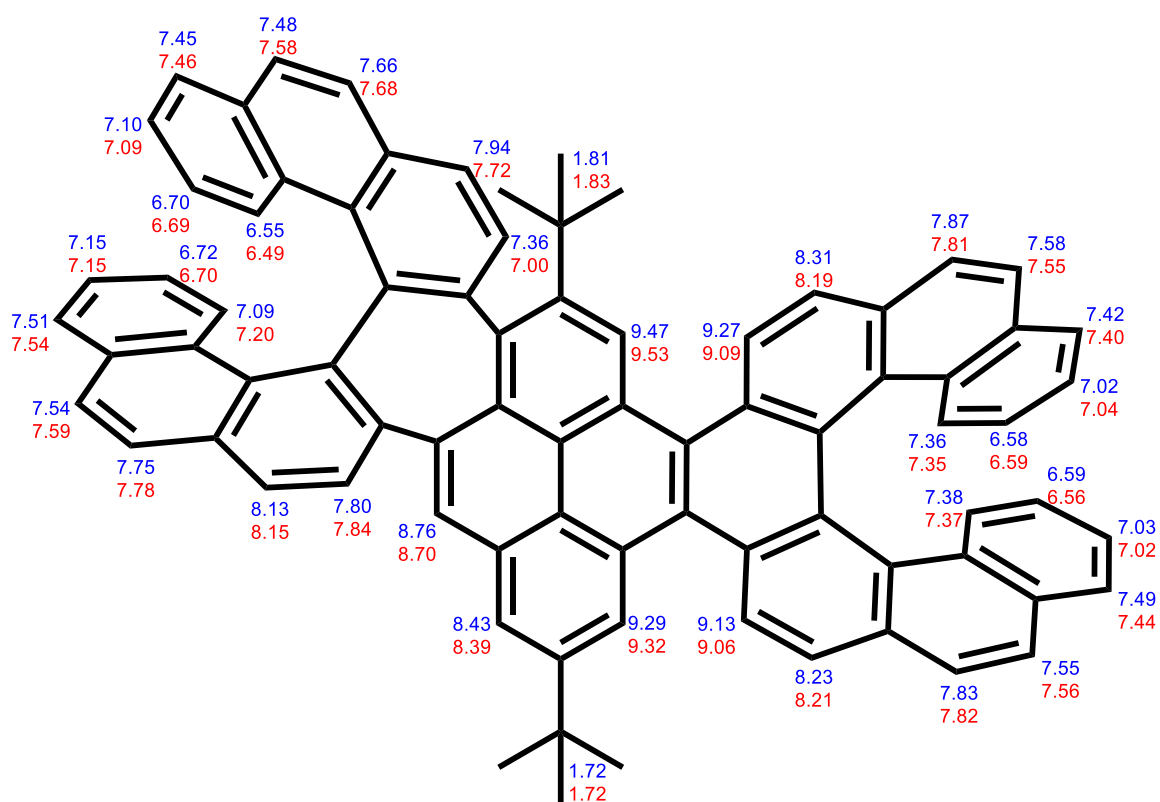

**Figure S6.**  $^1\text{H}$  NMR peaks assigned to respective atoms in (*P, P*)-**3** (blue), (*P, M*)-**3** (red).

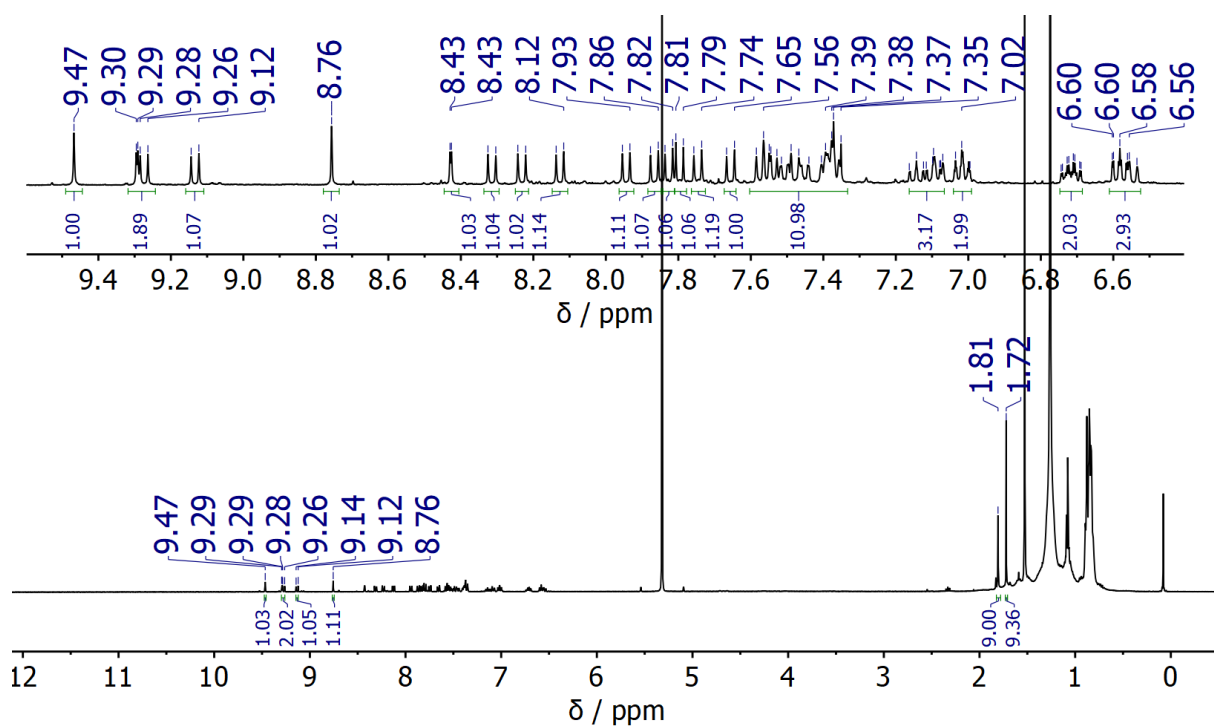

**Figure S7.**  $^1\text{H}$  NMR spectrum of  $(P, P)$ -3 (400 MHz,  $\text{CD}_2\text{Cl}_2$ ).

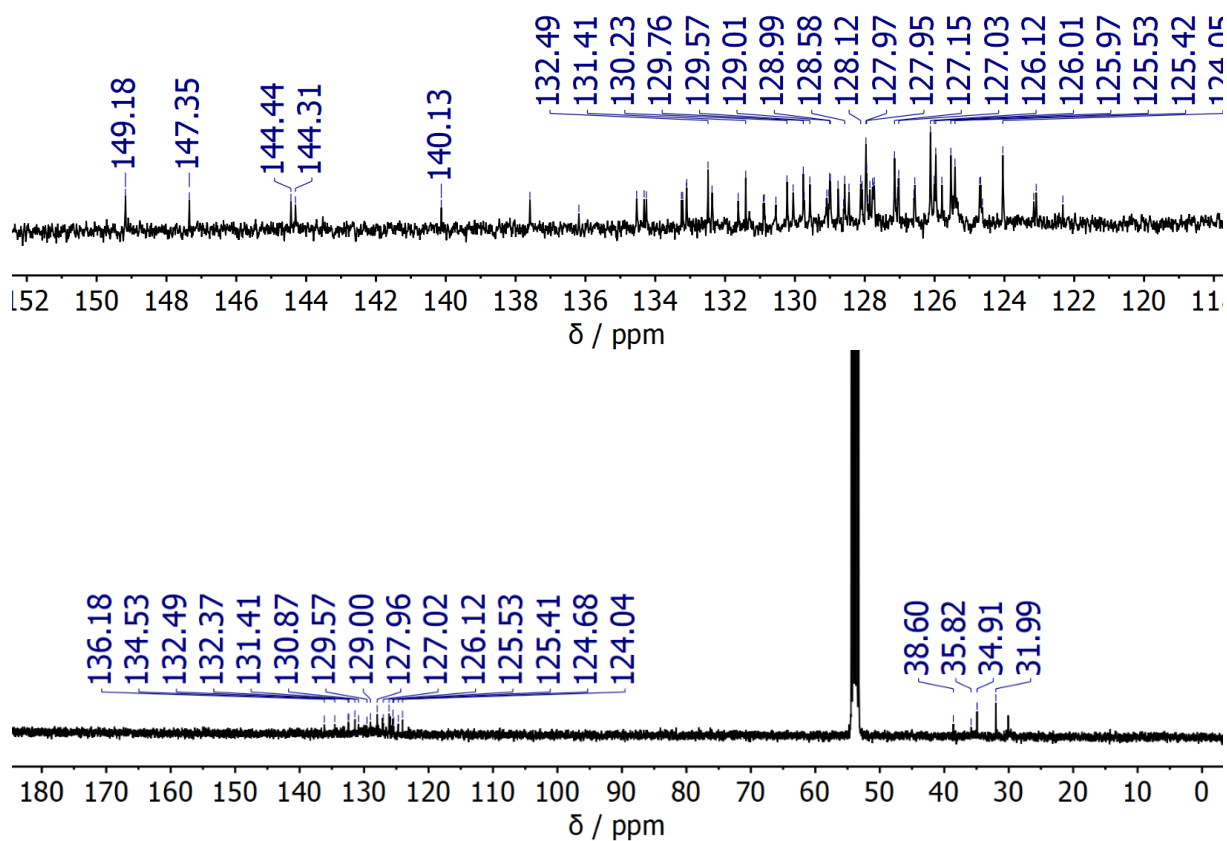

**Figure S8.**  $^{13}\text{C}\{^1\text{H}\}$  NMR spectrum of  $(P, P)$ -3 (101 MHz,  $\text{CD}_2\text{Cl}_2$ ).

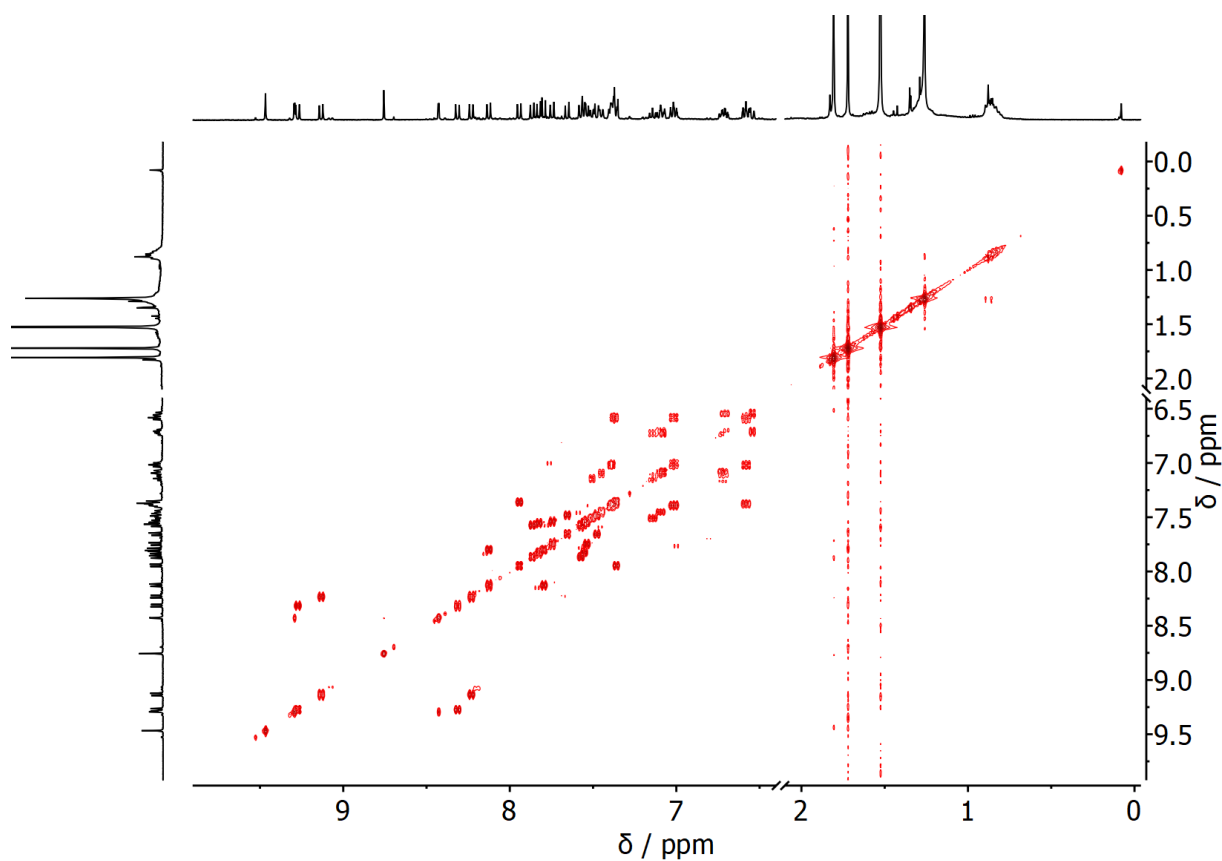

**Figure S9.**  $^1\text{H}$  –  $^1\text{H}$  COSY NMR spectrum of  $(P, P)$ -3 (400 MHz,  $\text{CD}_2\text{Cl}_2$ ).

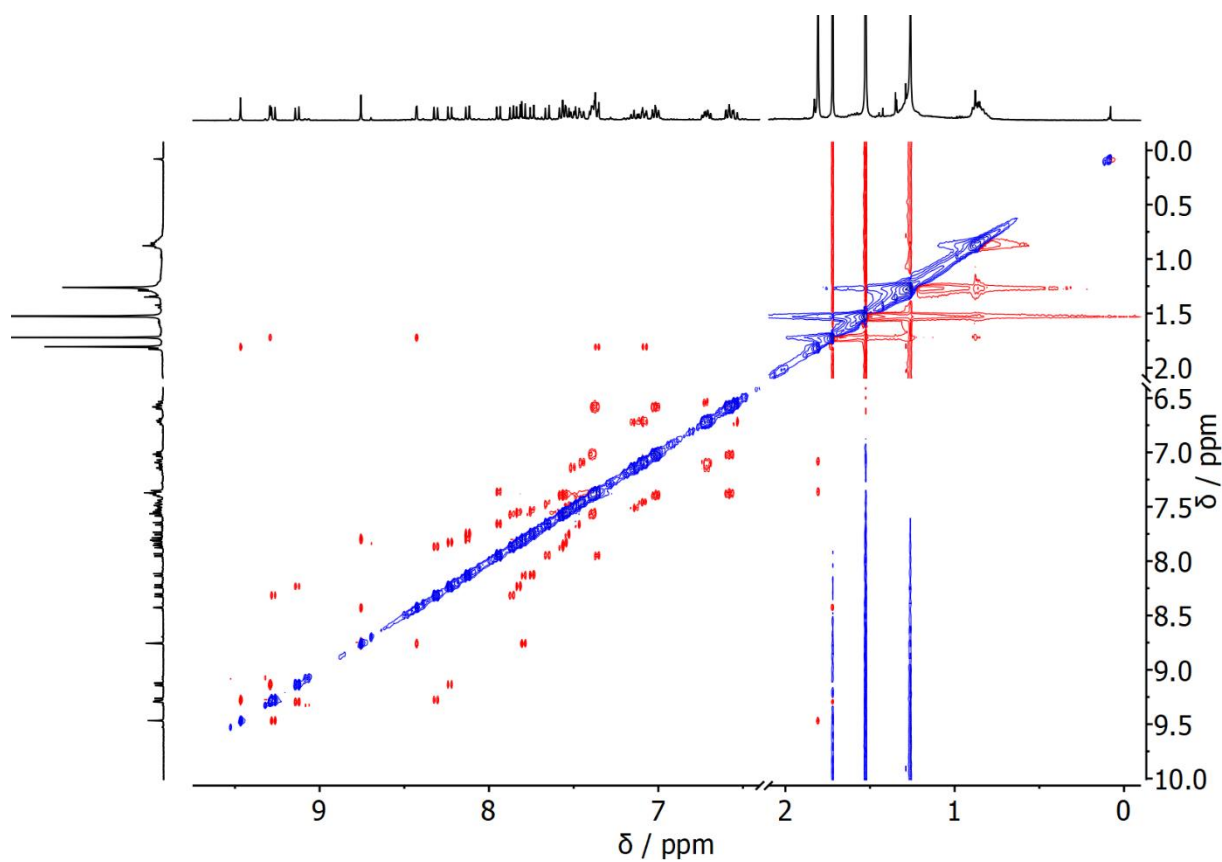

**Figure S10.**  $^1\text{H}$  –  $^1\text{H}$  NOESY NMR spectrum of  $(P, P)$ -3 (400 MHz,  $\text{CD}_2\text{Cl}_2$ ).

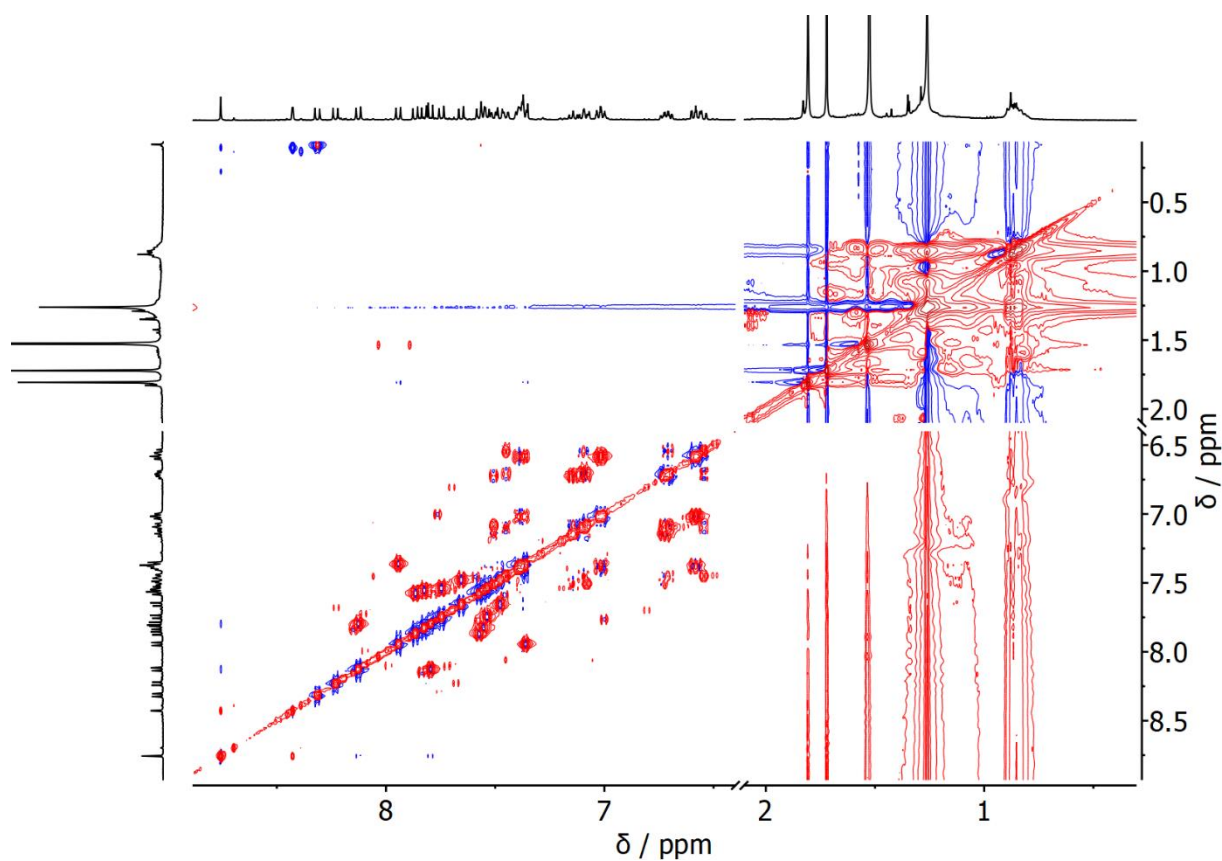

**Figure S11.**  $^1\text{H} - ^1\text{H}$  TOCSY NMR spectrum of (*P, P*)-**3** (400 MHz,  $\text{CD}_2\text{Cl}_2$ ).

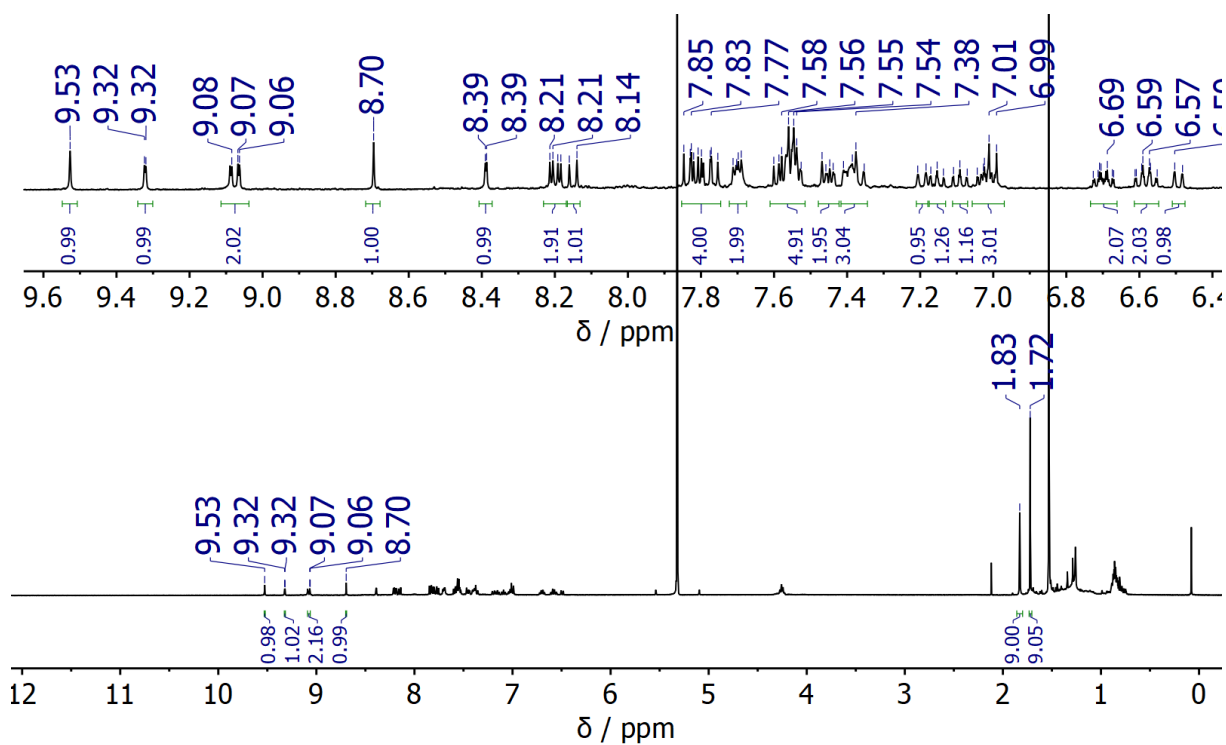

**Figure S12.**  $^1\text{H}$  NMR spectrum of (*P, M*)-**3** (400 MHz,  $\text{CD}_2\text{Cl}_2$ ).

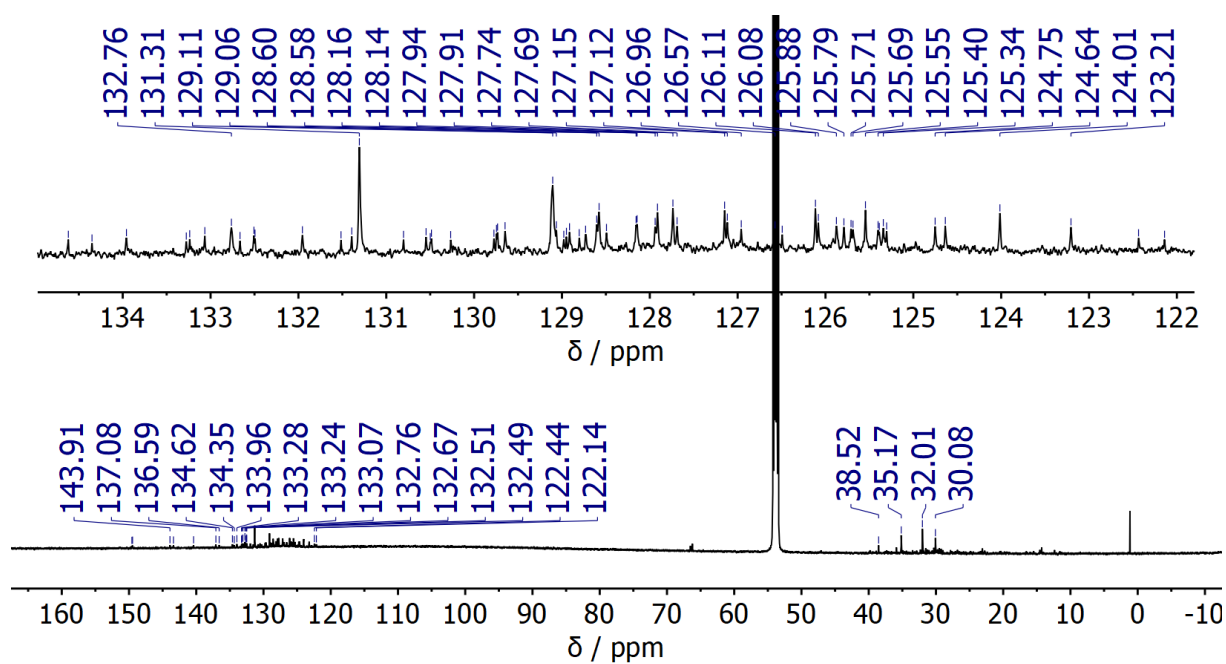

**Figure S13.**  $^{13}\text{C}\{^1\text{H}\}$  NMR spectrum of (*P, M*)-**3** (151 MHz,  $\text{CD}_2\text{Cl}_2$ ).

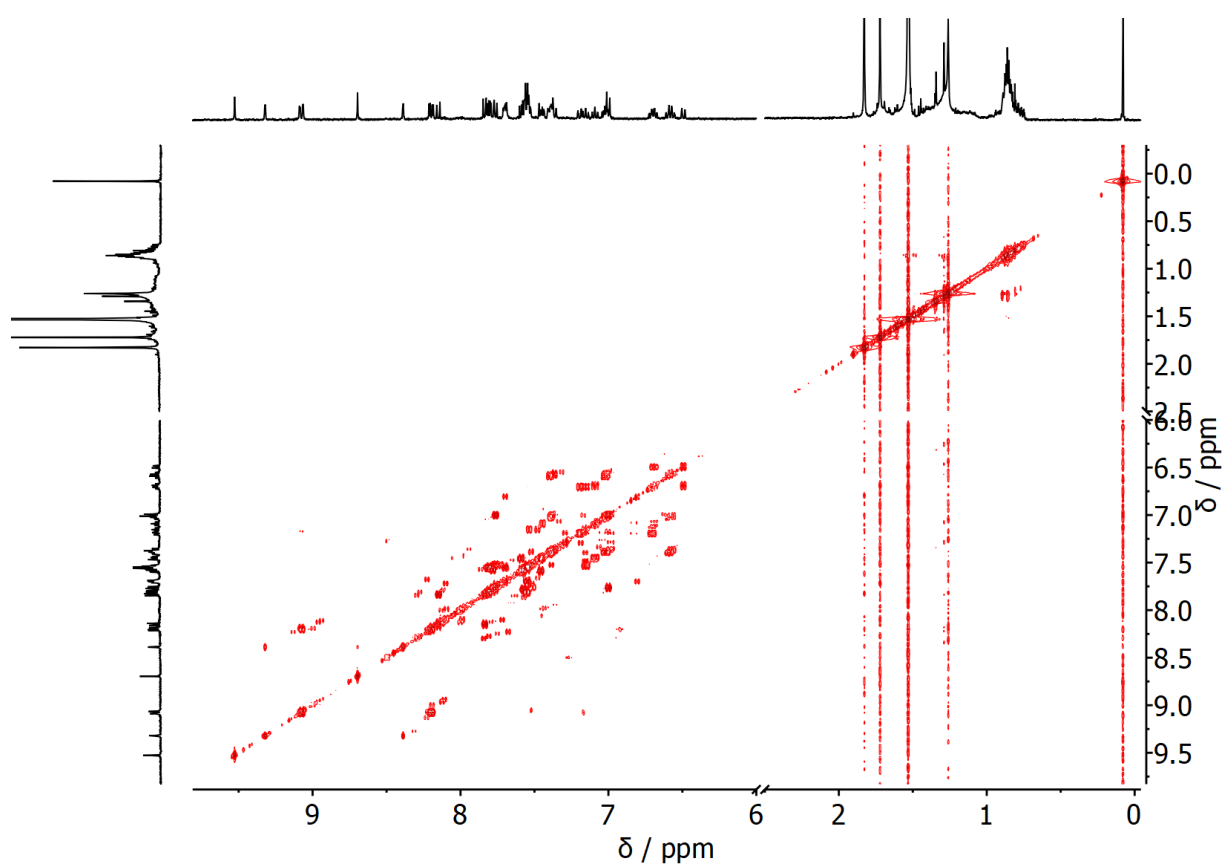

**Figure S14.**  $^1\text{H}$  –  $^1\text{H}$  COSY NMR spectrum of (*P, M*)-**3** (400 MHz,  $\text{CD}_2\text{Cl}_2$ ).

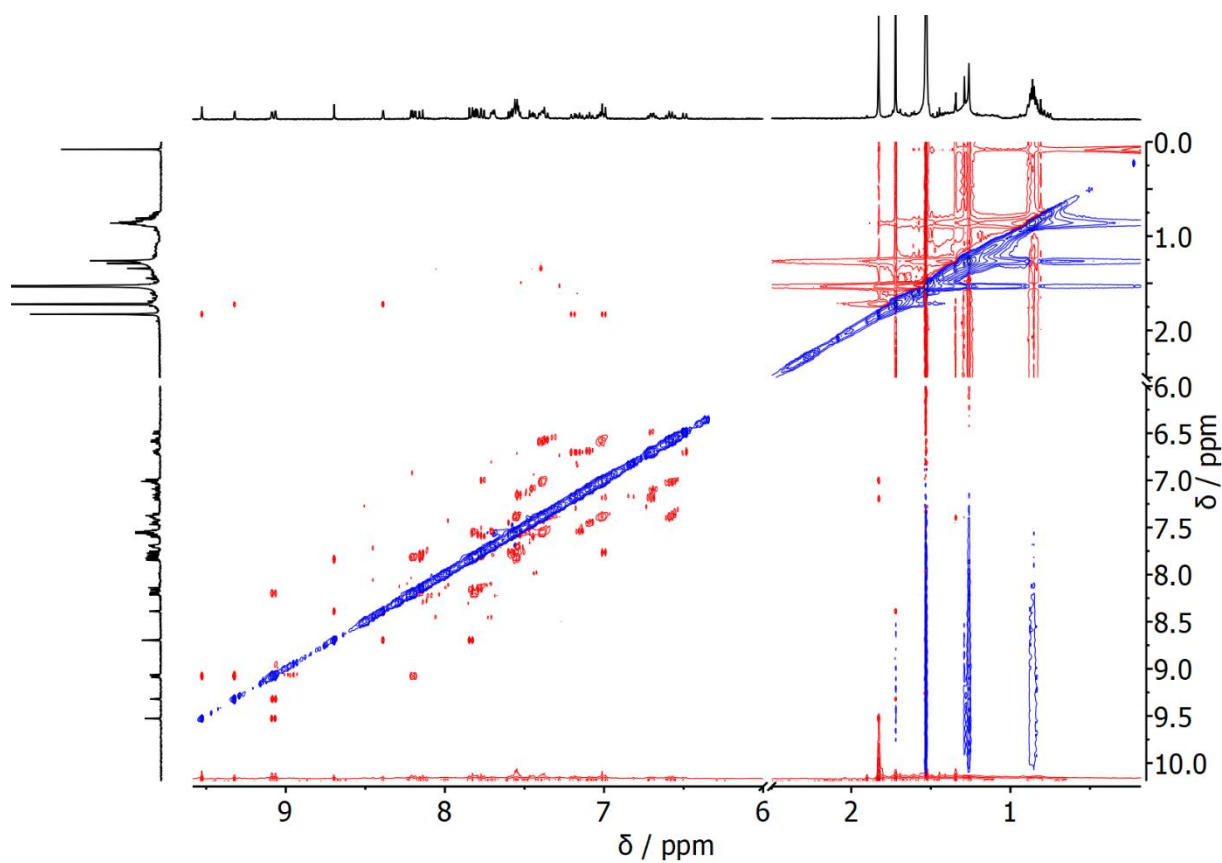

**Figure S15.**  $^1\text{H} - ^1\text{H}$  NOESY NMR spectrum of (*P, M*)-**3** (400 MHz,  $\text{CD}_2\text{Cl}_2$ ).

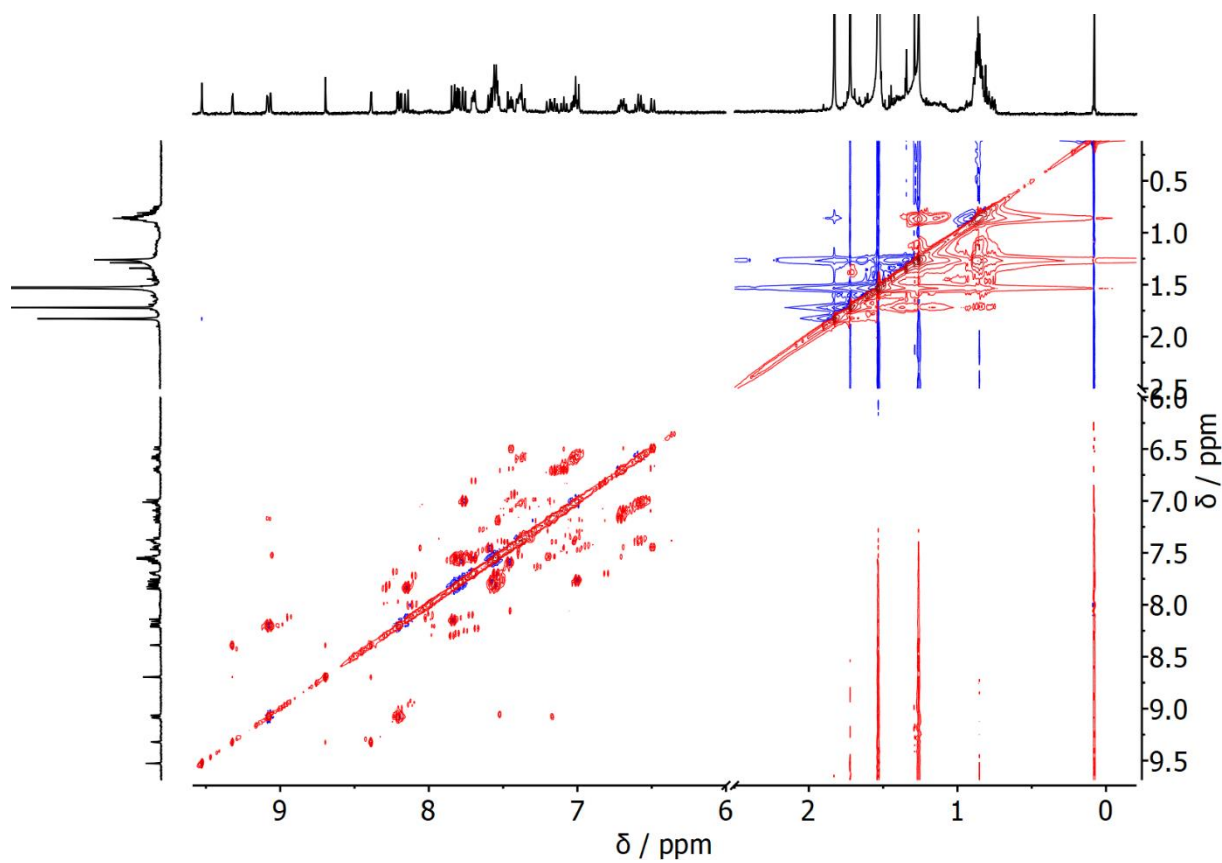

**Figure S16.**  $^1\text{H} - ^1\text{H}$  TOCSY NMR spectrum of (*P, M*)-**3** (400 MHz,  $\text{CD}_2\text{Cl}_2$ ).



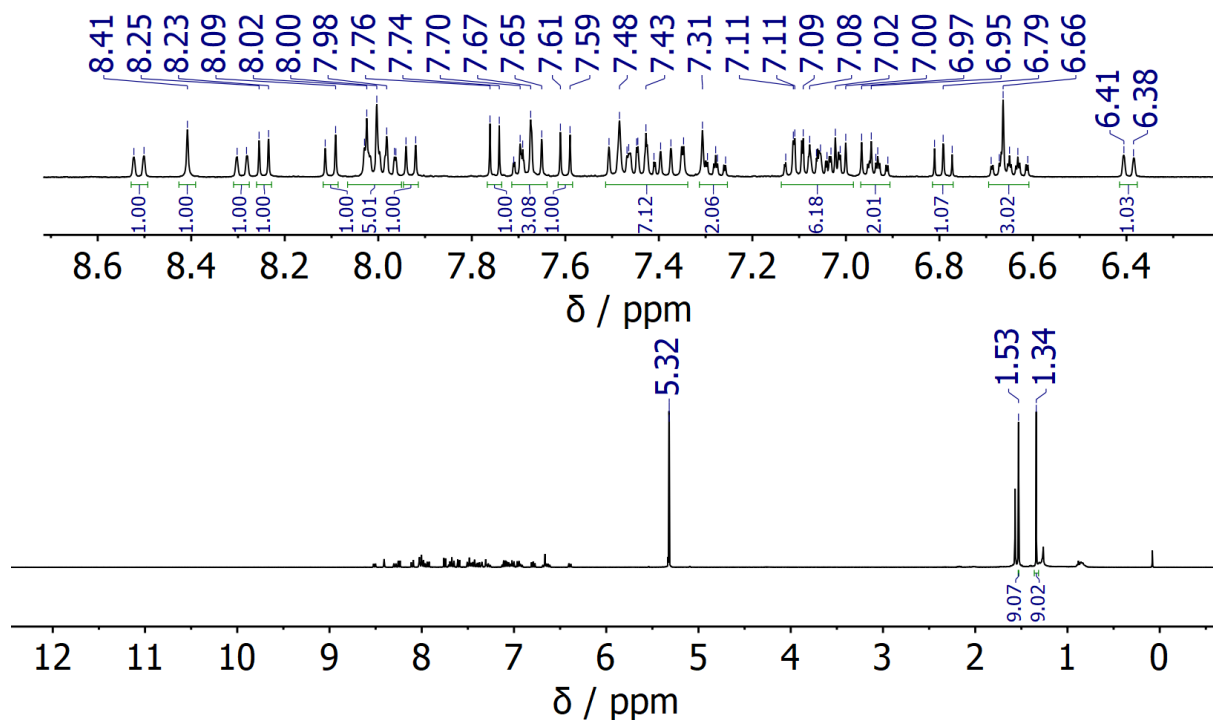

**Figure S17.**  $^1\text{H}$  NMR spectrum of **8** (400 MHz,  $\text{CD}_2\text{Cl}_2$ ).

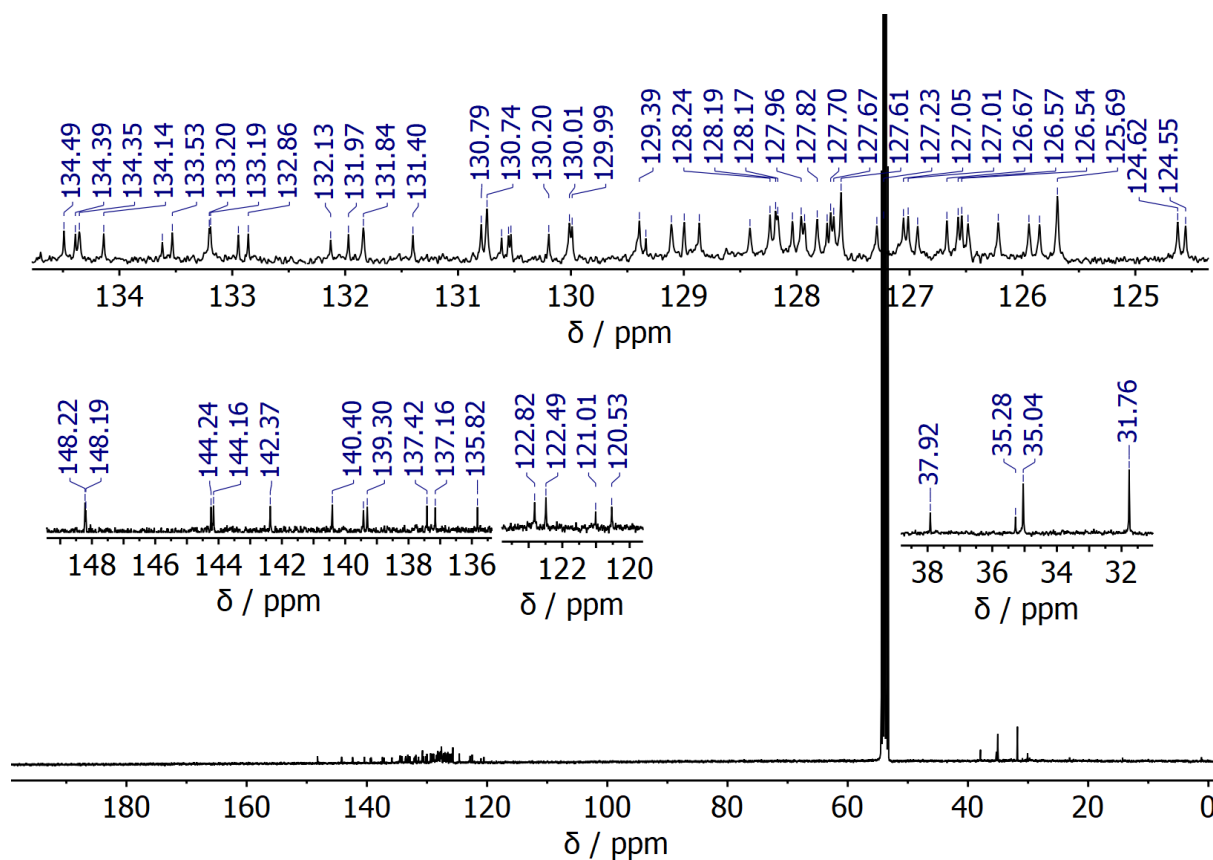

**Figure S18.**  $^{13}\text{C}\{^1\text{H}\}$  NMR spectrum of **8** (101 MHz,  $\text{CD}_2\text{Cl}_2$ ).

## S6. High-resolution mass spectrometry (HRMS)

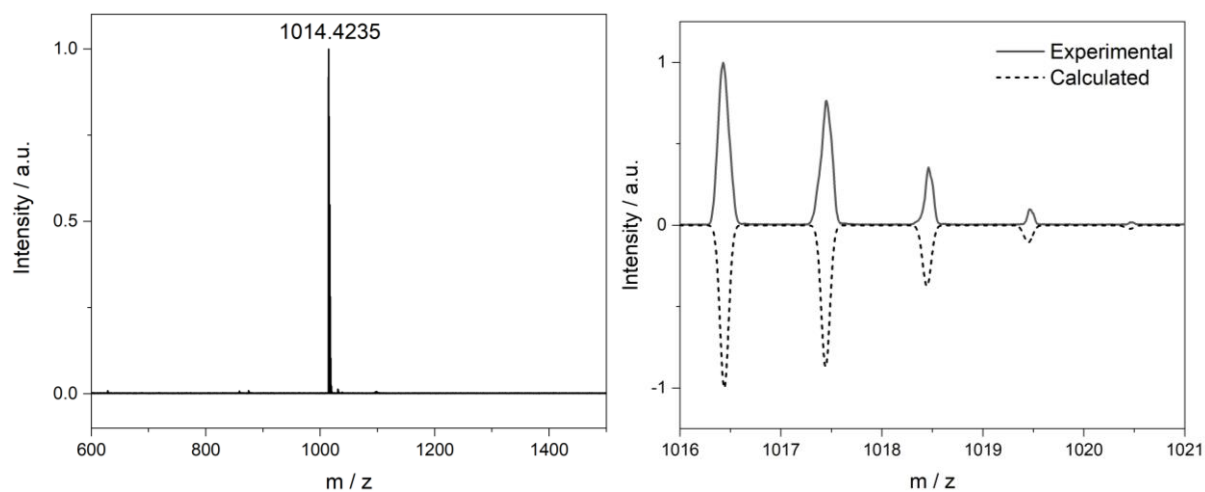

Figure S19. MALDI-TOF HRMS of  $(P, P)$ -3.

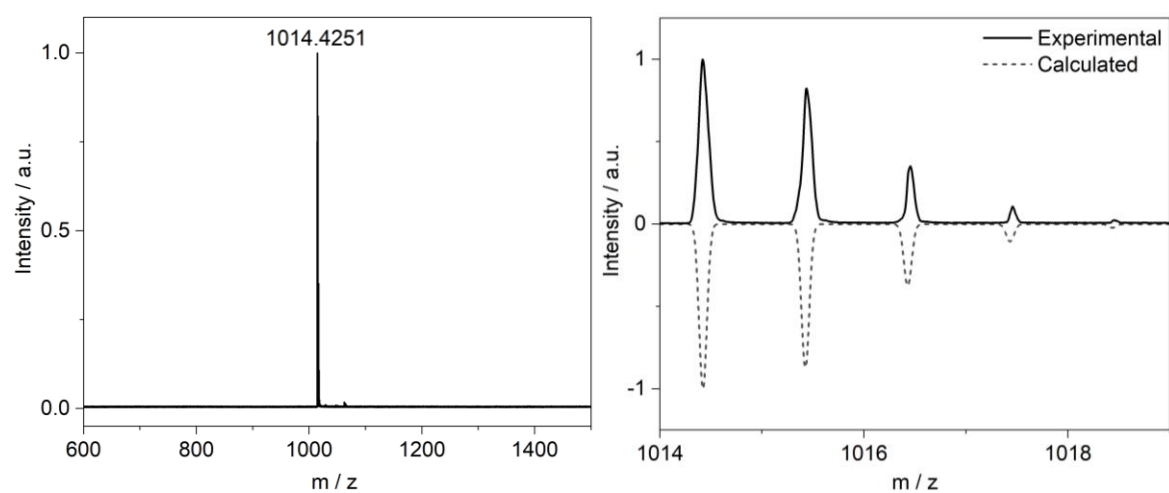

Figure S20. MALDI-TOF HRMS of  $(P, M)$ -3.

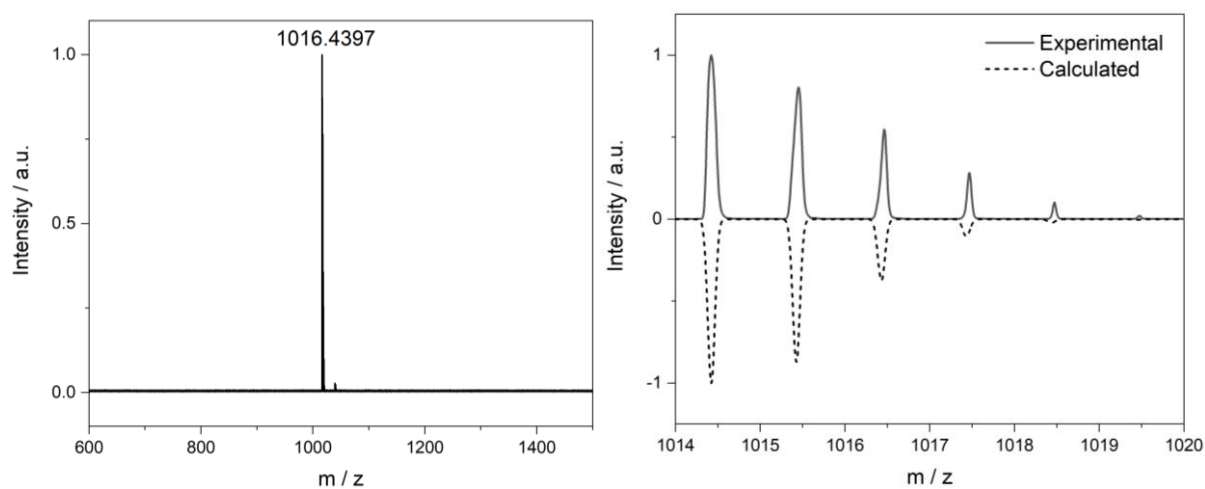

Figure S21. MALDI-TOF HRMS of 6.

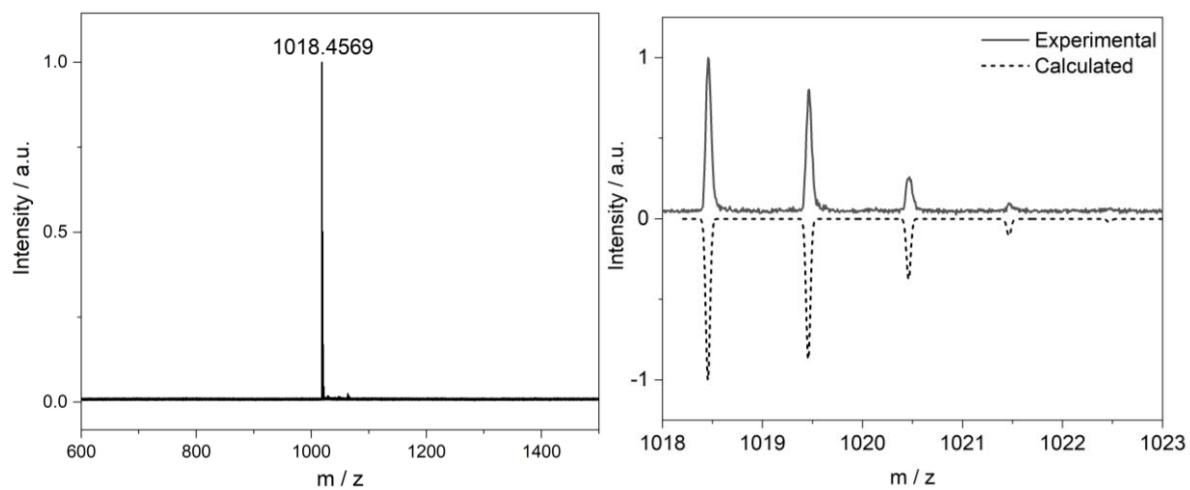

**Figure S22.** MALDI-TOF HRMS of **7**.

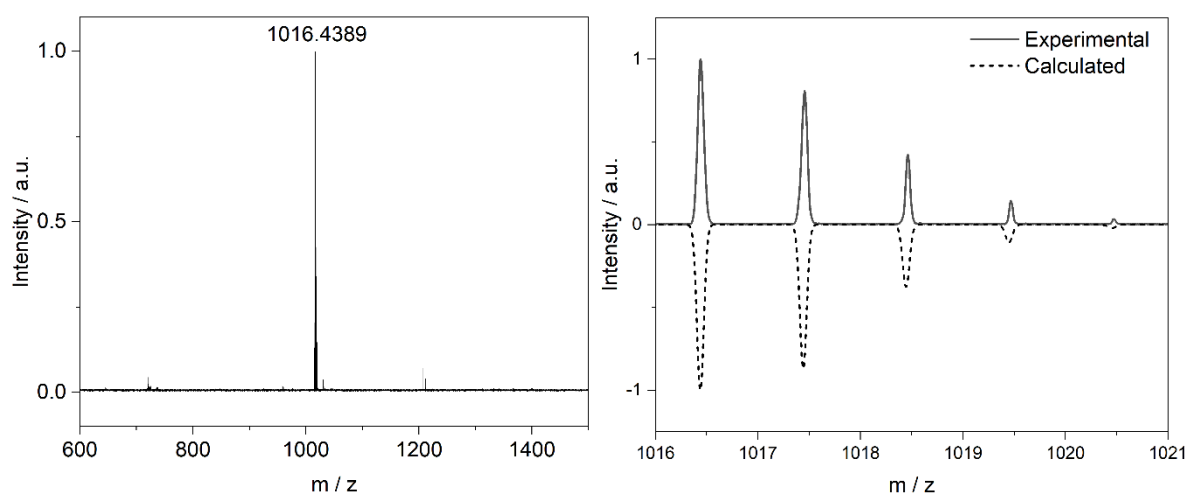

**Figure S23.** MALDI-TOF HRMS of **8**.

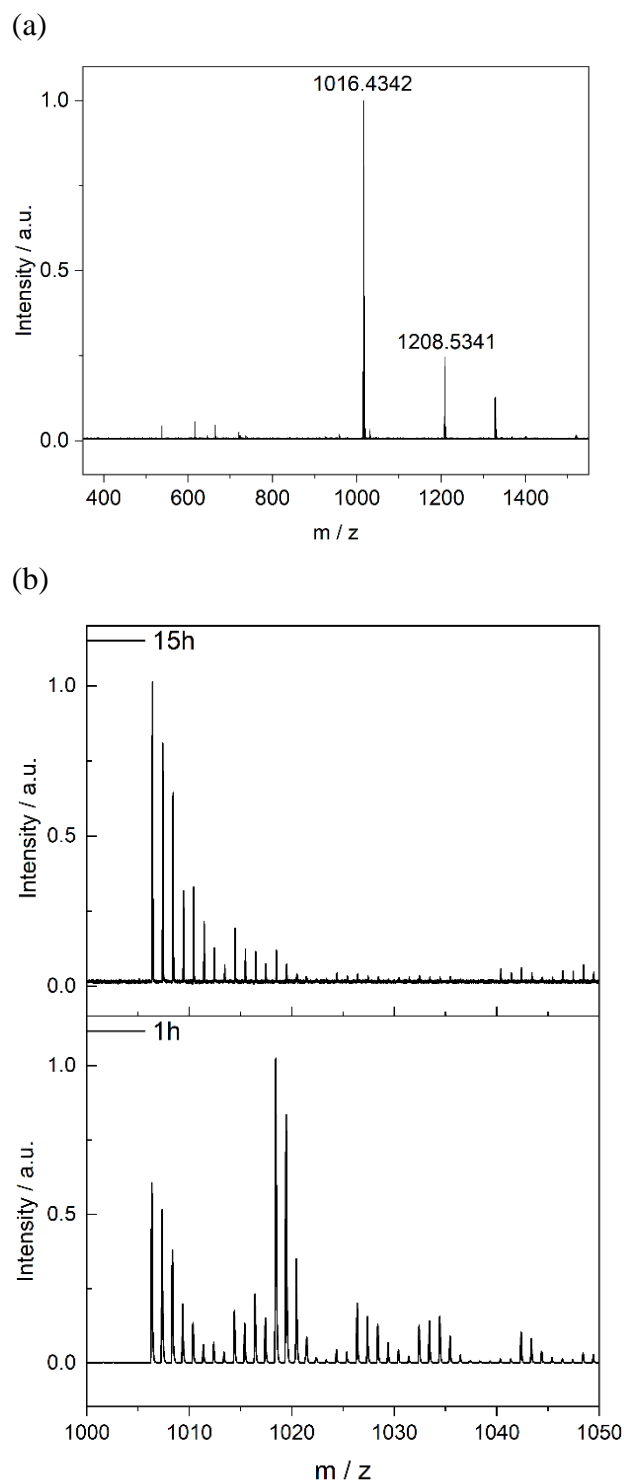

**Figure S24.** MALDI-TOF HRMS of reaction mixture of (a) Suzuki coupling–C-H activation after heating overnight for 15h (b) Scholl reaction with **7** in presence of triflic acid.













### 3A Excited State S<sub>1</sub>

|   |              |              |              |   |              |              |              |   |               |              |              |
|---|--------------|--------------|--------------|---|--------------|--------------|--------------|---|---------------|--------------|--------------|
| C | 2.030346000  | -0.988663000 | -0.137674000 | C | -8.041076000 | -3.415298000 | 1.977064000  | H | -1.916140000  | -2.084406000 | -2.391250000 |
| C | 1.106601000  | -2.044705000 | -0.356247000 | C | -8.496123000 | -2.199361000 | 2.431046000  | H | -3.761291000  | -3.502706000 | -3.173373000 |
| C | -0.229950000 | -1.717628000 | -0.526254000 | C | 6.343723000  | -2.461191000 | -0.118181000 | H | -6.119488000  | -4.115190000 | -3.142802000 |
| C | 0.321680000  | 4.409586000  | -0.561011000 | C | 7.184125000  | -3.485038000 | 0.258850000  | H | -8.453960000  | -3.608040000 | -2.532571000 |
| C | -1.021287000 | 4.738086000  | -0.477828000 | C | 8.500434000  | -3.540241000 | -0.221071000 | H | -5.443425000  | 3.223224000  | 2.884284000  |
| C | -1.950541000 | 3.691257000  | -0.361042000 | C | 8.925031000  | -2.588250000 | -1.117380000 | H | -3.350408000  | 3.234760000  | 1.619207000  |
| C | 0.758043000  | 3.065267000  | -0.567004000 | C | 8.680556000  | 1.118363000  | 2.657637000  | H | -9.073066000  | 0.228837000  | 3.427361000  |
| C | -0.188416000 | 2.024842000  | -0.450081000 | C | 8.854408000  | 2.124430000  | 1.737211000  | H | -7.552073000  | 2.169318000  | 3.479607000  |
| C | -1.567309000 | 2.345458000  | -0.290595000 | C | 7.819391000  | 2.411518000  | 0.835173000  | H | 3.648512000   | 2.492802000  | -2.892522000 |
| C | 2.120230000  | 2.715562000  | -0.760403000 | C | 6.666146000  | 1.658065000  | 0.828001000  | H | 5.880831000   | 2.076755000  | -3.853664000 |
| C | 2.554608000  | 1.411959000  | -0.737302000 | H | -0.951206000 | -2.521318000 | -0.595606000 | H | 7.969350000   | 0.939328000  | -3.868376000 |
| C | 1.616582000  | 0.360513000  | -0.448167000 | H | 1.074811000  | 5.187838000  | -0.650611000 | H | 9.507532000   | -0.759166000 | -2.962667000 |
| C | 0.244633000  | 0.669777000  | -0.440048000 | H | -3.008708000 | 3.915055000  | -0.366809000 | H | 3.745882000   | -2.468022000 | 3.852601000  |
| C | -0.723278000 | -0.388826000 | -0.496476000 | H | 2.831508000  | 3.510223000  | -0.968808000 | H | 1.990698000   | -2.305764000 | 2.131329000  |
| C | -2.096565000 | -0.059501000 | -0.538646000 | H | -1.111511000 | 8.012914000  | 0.650470000  | H | 8.077221000   | -0.742784000 | 4.468410000  |
| C | -2.501469000 | 1.265656000  | -0.108235000 | H | -1.131371000 | 6.522786000  | 1.613586000  | H | 5.929734000   | -1.935099000 | 4.672684000  |
| C | -1.453926000 | 6.210640000  | -0.523117000 | H | 0.278578000  | 6.919762000  | 0.623181000  | H | -10.108290000 | -2.031618000 | -1.688018000 |
| C | -0.813687000 | 6.958869000  | 0.661407000  | H | -1.288414000 | 7.893471000  | -1.895383000 | H | -10.699151000 | 0.216476000  | -0.840961000 |
| C | -0.983714000 | 6.842499000  | -1.846561000 | H | 0.104553000  | 6.805330000  | -1.948695000 | H | -8.894321000  | 1.890930000  | -0.448793000 |
| C | 1.486962000  | -3.537488000 | -0.522980000 | H | -1.419570000 | 6.319025000  | -2.702995000 | H | -6.550532000  | 1.269497000  | -0.739498000 |
| C | 2.999788000  | -3.806616000 | -0.523177000 | H | 3.528971000  | -3.122608000 | -1.193577000 | H | -4.953750000  | -2.491049000 | 0.924107000  |
| C | 0.970037000  | -3.971807000 | -1.915565000 | H | 3.440198000  | -3.721166000 | 0.470888000  | H | -6.354903000  | -4.480614000 | 1.141779000  |
| C | 0.821101000  | -4.423513000 | 0.545049000  | H | 3.181509000  | -4.827512000 | -0.873545000 | H | -8.665095000  | -4.299319000 | 2.060555000  |
| C | -2.977054000 | 6.376440000  | -0.426883000 | H | 1.247955000  | -5.013461000 | -2.107557000 | H | -9.473796000  | -2.116734000 | 2.897622000  |
| C | -4.478459000 | -0.637102000 | -0.654214000 | H | 1.409514000  | -3.349865000 | -2.701196000 | H | 5.330556000   | -2.471460000 | 0.250778000  |
| C | -4.646813000 | 0.258929000  | 0.505693000  | H | -0.118043000 | -3.901555000 | -1.996250000 | H | 6.814414000   | -4.255188000 | 0.928077000  |
| C | -3.153208000 | -0.917469000 | -1.039948000 | H | -0.265780000 | -4.301754000 | 0.557537000  | H | 9.165055000   | -4.340209000 | 0.088805000  |
| C | -3.741476000 | 1.356215000  | 0.588114000  | H | 1.197574000  | -4.197656000 | 1.546483000  | H | 9.925353000   | -2.636963000 | -1.538631000 |
| C | -2.918616000 | -1.922590000 | -2.014635000 | H | 1.036586000  | -5.477741000 | 0.340725000  | H | 9.447094000   | 0.912936000  | 3.399726000  |
| C | -5.564139000 | -1.231163000 | -1.360665000 | H | -3.230641000 | 7.440670000  | -0.449759000 | H | 9.767352000   | 2.711129000  | 1.729140000  |
| C | -5.291456000 | -2.370268000 | -2.158027000 | H | -3.373849000 | 5.962290000  | 0.505867000  | H | 7.918200000   | 3.238462000  | 0.139438000  |
| C | -3.953897000 | -2.680802000 | -2.489550000 | H | -3.492843000 | 5.896372000  | -1.264482000 | H | 5.878185000   | 1.934202000  | 0.142344000  |
| C | -6.365216000 | -3.215093000 | -2.586514000 |   |              |              |              |   |               |              |              |
| C | -7.648945000 | -2.932435000 | -2.258400000 |   |              |              |              |   |               |              |              |
| C | -7.982763000 | -1.685999000 | -1.632205000 |   |              |              |              |   |               |              |              |
| C | -6.951165000 | -0.784913000 | -1.274652000 |   |              |              |              |   |               |              |              |
| C | -5.675533000 | 0.111787000  | 1.471563000  |   |              |              |              |   |               |              |              |
| C | -6.040150000 | 1.249807000  | 2.236781000  |   |              |              |              |   |               |              |              |
| C | -5.192989000 | 2.389035000  | 2.234740000  |   |              |              |              |   |               |              |              |
| C | -4.048909000 | 2.417155000  | 1.496211000  |   |              |              |              |   |               |              |              |
| C | -6.436525000 | -1.116306000 | 1.682825000  |   |              |              |              |   |               |              |              |
| C | -7.695763000 | -1.040672000 | 2.328057000  |   |              |              |              |   |               |              |              |
| C | -8.108545000 | 0.189959000  | 2.929596000  |   |              |              |              |   |               |              |              |
| C | -7.272698000 | 1.261886000  | 2.951637000  |   |              |              |              |   |               |              |              |
| C | 4.718878000  | 0.099966000  | -0.725879000 |   |              |              |              |   |               |              |              |
| C | 4.374698000  | -0.398467000 | 0.631771000  |   |              |              |              |   |               |              |              |
| C | 3.892358000  | 1.072002000  | -1.285053000 |   |              |              |              |   |               |              |              |
| C | 3.166361000  | -1.091613000 | 0.789143000  |   |              |              |              |   |               |              |              |
| C | 4.308170000  | 1.756099000  | -2.446825000 |   |              |              |              |   |               |              |              |
| C | 5.923872000  | -0.299783000 | -1.388972000 |   |              |              |              |   |               |              |              |
| C | 6.361875000  | 0.485431000  | -2.483791000 |   |              |              |              |   |               |              |              |
| C | 5.537127000  | 1.505990000  | -2.995784000 |   |              |              |              |   |               |              |              |
| C | 7.665030000  | 0.290444000  | -3.052243000 |   |              |              |              |   |               |              |              |
| C | 8.506138000  | -0.641971000 | -2.558706000 |   |              |              |              |   |               |              |              |
| C | 8.071917000  | -1.543643000 | -1.531539000 |   |              |              |              |   |               |              |              |
| C | 6.768019000  | -1.427422000 | -0.983708000 |   |              |              |              |   |               |              |              |
| C | 5.301875000  | -0.293335000 | 1.713214000  |   |              |              |              |   |               |              |              |
| C | 5.098301000  | -1.123958000 | 2.843083000  |   |              |              |              |   |               |              |              |
| C | 3.905298000  | -1.870784000 | 2.959300000  |   |              |              |              |   |               |              |              |
| C | 2.943745000  | -1.809025000 | 1.991419000  |   |              |              |              |   |               |              |              |
| C | 6.487782000  | 0.566109000  | 1.708224000  |   |              |              |              |   |               |              |              |
| C | 7.498088000  | 0.348440000  | 2.680948000  |   |              |              |              |   |               |              |              |
| C | 7.290429000  | -0.602106000 | 3.733007000  |   |              |              |              |   |               |              |              |
| C | 6.114025000  | -1.259138000 | 3.842665000  |   |              |              |              |   |               |              |              |
| C | -9.330411000 | -1.314210000 | -1.441896000 |   |              |              |              |   |               |              |              |
| C | -9.659270000 | -0.059299000 | -0.983704000 |   |              |              |              |   |               |              |              |
| C | -8.642094000 | 0.879328000  | -0.749080000 |   |              |              |              |   |               |              |              |
| C | -7.319639000 | 0.525359000  | -0.903303000 |   |              |              |              |   |               |              |              |
| C | -5.958285000 | -2.390942000 | 1.315572000  |   |              |              |              |   |               |              |              |
| C | -6.744734000 | -3.514989000 | 1.446519000  |   |              |              |              |   |               |              |              |

**1 Excited State S<sub>1</sub>**

|   |              |              |              |   |              |              |              |
|---|--------------|--------------|--------------|---|--------------|--------------|--------------|
| C | 0.670574000  | 0.106314000  | -6.002296000 | H | 0.214917000  | -2.085057000 | 6.939272000  |
| C | -0.670574000 | -0.106314000 | -6.002296000 | H | -2.215984000 | -1.646321000 | 6.805945000  |
| C | 1.404992000  | 0.207014000  | -4.775871000 | H | -3.276291000 | -1.273129000 | 4.581828000  |
| C | 0.709563000  | 0.085182000  | -3.557276000 | H | -1.901855000 | -1.188149000 | 2.557282000  |
| C | -0.709563000 | -0.085182000 | -3.557276000 | H | -5.361234000 | 0.387580000  | -1.716513000 |
| C | -1.404992000 | -0.207014000 | -4.775871000 | H | -5.552025000 | 1.290271000  | -3.227558000 |
| C | 2.802773000  | 0.413465000  | -4.768287000 | H | -6.799383000 | 0.139185000  | -2.711467000 |
| C | 3.510040000  | 0.521016000  | -3.584288000 | H | -6.715395000 | -1.076362000 | -4.839371000 |
| C | 2.803834000  | 0.368676000  | -2.377700000 | H | -5.517007000 | 0.053642000  | -5.479801000 |
| C | 1.435381000  | 0.096359000  | -2.329527000 | H | -5.208387000 | -1.695205000 | -5.520541000 |
| C | -1.435381000 | -0.096359000 | -2.329527000 | H | -6.322473000 | -2.371024000 | -2.766882000 |
| C | -2.803834000 | -0.368676000 | -2.377700000 | H | -4.757144000 | -2.965500000 | -3.354632000 |
| C | -3.510040000 | -0.521016000 | -3.584288000 | H | -4.864049000 | -2.141260000 | -1.793594000 |
| C | -2.802773000 | -0.413465000 | -4.768287000 | H | 5.208387000  | 1.695205000  | -5.520541000 |
| C | -0.529639000 | 0.518863000  | 1.296930000  | H | 6.715395000  | 1.076362000  | -4.839371000 |
| C | 0.529639000  | -0.518863000 | 1.296930000  | H | 5.517007000  | -0.053642000 | -5.479801000 |
| C | -1.294251000 | 0.630847000  | 0.096376000  | H | 4.757144000  | 2.965500000  | -3.354632000 |
| C | 1.294251000  | -0.630847000 | 0.096376000  | H | 4.864049000  | 2.141260000  | -1.793594000 |
| C | 0.721793000  | -0.122369000 | -1.094112000 | H | 6.322473000  | 2.371024000  | -2.766882000 |
| C | -0.721793000 | 0.122369000  | -1.094112000 | H | 5.361234000  | -0.387580000 | -1.716513000 |
| C | -2.516608000 | 1.377432000  | 0.140171000  | H | 5.552025000  | -1.290271000 | -3.227558000 |
| C | -0.844414000 | 1.312175000  | 2.417785000  | H | 6.799383000  | -0.139185000 | -2.711467000 |
| C | -2.147925000 | 1.891143000  | 2.481916000  |   |              |              |              |
| C | -2.947721000 | 1.928681000  | 1.308531000  |   |              |              |              |
| C | -2.661991000 | 2.327345000  | 3.729547000  |   |              |              |              |
| C | -1.929323000 | 2.214652000  | 4.876356000  |   |              |              |              |
| C | -0.555461000 | 1.830005000  | 4.826240000  |   |              |              |              |
| C | 0.026549000  | 1.481746000  | 3.581229000  |   |              |              |              |
| C | 0.251397000  | 1.855603000  | 5.985248000  |   |              |              |              |
| C | 1.605960000  | 1.624781000  | 5.908569000  |   |              |              |              |
| C | 2.201698000  | 1.401331000  | 4.657790000  |   |              |              |              |
| C | 1.425374000  | 1.347178000  | 3.517229000  |   |              |              |              |
| C | 0.844414000  | -1.312175000 | 2.417785000  |   |              |              |              |
| C | 2.147925000  | -1.891143000 | 2.481916000  |   |              |              |              |
| C | 2.947721000  | -1.928681000 | 1.308531000  |   |              |              |              |
| C | 2.516608000  | -1.377432000 | 0.140171000  |   |              |              |              |
| C | -0.026549000 | -1.481746000 | 3.581229000  |   |              |              |              |
| C | 0.555461000  | -1.830005000 | 4.826240000  |   |              |              |              |
| C | 1.929323000  | -2.214652000 | 4.876356000  |   |              |              |              |
| C | 2.661991000  | -2.327345000 | 3.729547000  |   |              |              |              |
| C | -0.251397000 | -1.855603000 | 5.985248000  |   |              |              |              |
| C | -1.605960000 | -1.624781000 | 5.908569000  |   |              |              |              |
| C | -2.201698000 | -1.401331000 | 4.657790000  |   |              |              |              |
| C | -1.425374000 | -1.347178000 | 3.517229000  |   |              |              |              |
| C | -5.015770000 | -0.805139000 | -3.529423000 |   |              |              |              |
| C | 5.015770000  | 0.805139000  | -3.529423000 |   |              |              |              |
| C | -5.719956000 | 0.320811000  | -2.748063000 |   |              |              |              |
| C | -5.641921000 | -0.883491000 | -4.927855000 |   |              |              |              |
| C | -5.250731000 | -2.150448000 | -2.816660000 |   |              |              |              |
| C | 5.641921000  | 0.883491000  | -4.927855000 |   |              |              |              |
| C | 5.250731000  | 2.150448000  | -2.816660000 |   |              |              |              |
| C | 5.719956000  | -0.320811000 | -2.748063000 |   |              |              |              |
| H | 1.213361000  | 0.193143000  | -6.939334000 |   |              |              |              |
| H | -1.213361000 | -0.193143000 | -6.939334000 |   |              |              |              |
| H | 3.304479000  | 0.503993000  | -5.725628000 |   |              |              |              |
| H | 3.331870000  | 0.500156000  | -1.440259000 |   |              |              |              |
| H | -3.331870000 | -0.500156000 | -1.440259000 |   |              |              |              |
| H | -3.304479000 | -0.503993000 | -5.725628000 |   |              |              |              |
| H | -3.087055000 | 1.525420000  | -0.768126000 |   |              |              |              |
| H | -3.903217000 | 2.444636000  | 1.348663000  |   |              |              |              |
| H | -3.680724000 | 2.703421000  | 3.763838000  |   |              |              |              |
| H | -2.359164000 | 2.489397000  | 5.835127000  |   |              |              |              |
| H | -0.214917000 | 2.085057000  | 6.939272000  |   |              |              |              |
| H | 2.215984000  | 1.646321000  | 6.805945000  |   |              |              |              |
| H | 3.276291000  | 1.273129000  | 4.581828000  |   |              |              |              |
| H | 1.901855000  | 1.188149000  | 2.557282000  |   |              |              |              |
| H | 3.903217000  | -2.444636000 | 1.348663000  |   |              |              |              |
| H | 3.087055000  | -1.525420000 | -0.768126000 |   |              |              |              |
| H | 2.359164000  | -2.489397000 | 5.835127000  |   |              |              |              |
| H | 3.680724000  | -2.703421000 | 3.763838000  |   |              |              |              |

## 2 Excited State S<sub>1</sub>

|   |              |              |              |   |              |              |              |
|---|--------------|--------------|--------------|---|--------------|--------------|--------------|
| C | 6.117487000  | -0.097686000 | 0.468289000  | H | 5.665034000  | -4.089615000 | 0.953030000  |
| C | 5.886575000  | -1.441122000 | 0.162815000  | H | 7.379108000  | -4.358649000 | 1.295268000  |
| C | 4.598815000  | -1.816607000 | -0.215147000 | H | 8.697786000  | -1.150508000 | -0.041925000 |
| C | 1.950197000  | 3.737042000  | 0.084379000  | H | 9.096213000  | -2.707828000 | 0.689895000  |
| C | 0.651118000  | 3.371918000  | -0.118700000 | H | 8.288736000  | -1.469647000 | 1.657093000  |
| C | 0.333585000  | 1.954057000  | -0.010909000 | H | -1.751504000 | 2.981010000  | -1.487255000 |
| C | 2.993754000  | 2.777049000  | 0.290403000  | H | -2.363133000 | 4.640158000  | -1.394580000 |
| C | 2.722408000  | 1.409482000  | 0.015552000  | H | -2.305981000 | 3.643119000  | 0.056540000  |
| C | 1.396646000  | 0.993519000  | -0.296215000 | H | -0.816379000 | 3.244514000  | 1.997836000  |
| C | 4.310270000  | 3.160566000  | 0.627523000  | H | -2.516829000 | 2.374739000  | 3.541709000  |
| C | 5.326798000  | 2.241576000  | 0.710674000  | H | -3.973827000 | 0.638134000  | 4.289352000  |
| C | 5.094471000  | 0.868145000  | 0.415678000  | H | -4.939265000 | -1.619364000 | 4.071303000  |
| C | 3.783696000  | 0.469611000  | 0.042582000  | H | -1.143105000 | -2.669752000 | -3.960766000 |
| C | 3.538177000  | -0.889376000 | -0.289825000 | H | 0.930795000  | -1.784187000 | -2.962390000 |
| C | 2.241413000  | -1.246195000 | -0.717848000 | H | -5.754289000 | -2.274260000 | -3.158360000 |
| C | 1.189237000  | -0.333829000 | -0.745218000 | H | -3.520547000 | -2.879554000 | -4.005492000 |
| C | -0.363613000 | 4.432357000  | -0.609827000 | H | -4.948238000 | -3.799541000 | 3.054937000  |
| C | -0.464063000 | 5.616169000  | 0.367976000  | H | -3.984597000 | -5.466470000 | 1.500678000  |
| C | 0.166138000  | 4.950152000  | -1.967125000 | H | -2.054660000 | -4.817403000 | 0.059284000  |
| C | 6.994647000  | -2.502405000 | 0.223356000  | H | -1.196284000 | -2.550136000 | 0.090521000  |
| C | 7.172458000  | -3.133197000 | -1.170580000 | H | -3.227187000 | 1.509465000  | 0.002451000  |
| C | 6.597643000  | -3.593303000 | 1.235771000  | H | -5.453886000 | 2.249724000  | 0.594802000  |
| C | 8.343681000  | -1.913927000 | 0.658173000  | H | -7.463841000 | 1.032005000  | -0.250401000 |
| C | -1.775640000 | 3.882096000  | -0.867157000 | H | -7.156923000 | -0.868138000 | -1.806473000 |
| C | -1.363063000 | 0.189557000  | 0.540502000  |   |              |              |              |
| C | -1.322156000 | -0.383993000 | -0.826209000 |   |              |              |              |
| C | -0.775303000 | 1.478657000  | 0.743472000  |   |              |              |              |
| C | -0.086102000 | -0.733332000 | -1.373265000 |   |              |              |              |
| C | -1.249866000 | 2.263573000  | 1.840561000  |   |              |              |              |
| C | -2.175758000 | -0.399457000 | 1.549057000  |   |              |              |              |
| C | -2.635902000 | 0.427199000  | 2.606777000  |   |              |              |              |
| C | -2.165499000 | 1.766721000  | 2.712800000  |   |              |              |              |
| C | -3.624273000 | -0.040089000 | 3.516109000  |   |              |              |              |
| C | -4.155710000 | -1.284520000 | 3.397894000  |   |              |              |              |
| C | -3.656474000 | -2.196687000 | 2.419818000  |   |              |              |              |
| C | -2.626318000 | -1.791307000 | 1.529186000  |   |              |              |              |
| C | -2.533176000 | -0.702893000 | -1.528607000 |   |              |              |              |
| C | -2.447774000 | -1.604492000 | -2.616219000 |   |              |              |              |
| C | -1.186565000 | -2.001228000 | -3.105714000 |   |              |              |              |
| C | -0.034145000 | -1.528943000 | -2.537855000 |   |              |              |              |
| C | -3.858240000 | -0.190461000 | -1.178342000 |   |              |              |              |
| C | -5.006212000 | -0.804145000 | -1.742733000 |   |              |              |              |
| C | -4.858992000 | -1.821916000 | -2.741825000 |   |              |              |              |
| C | -3.634868000 | -2.157076000 | -3.202559000 |   |              |              |              |
| C | -4.144434000 | -3.522462000 | 2.378475000  |   |              |              |              |
| C | -3.603320000 | -4.450635000 | 1.522813000  |   |              |              |              |
| C | -2.524830000 | -4.080981000 | 0.702944000  |   |              |              |              |
| C | -2.047051000 | -2.789326000 | 0.713023000  |   |              |              |              |
| C | -4.071177000 | 0.943695000  | -0.362501000 |   |              |              |              |
| C | -5.337354000 | 1.374797000  | -0.036595000 |   |              |              |              |
| C | -6.467176000 | 0.699159000  | -0.521678000 |   |              |              |              |
| C | -6.295974000 | -0.362949000 | -1.377510000 |   |              |              |              |
| H | 7.109005000  | 0.237613000  | 0.752153000  |   |              |              |              |
| H | 4.384679000  | -2.851428000 | -0.469037000 |   |              |              |              |
| H | 2.241544000  | 4.783799000  | 0.039734000  |   |              |              |              |
| H | 4.511262000  | 4.209960000  | 0.825944000  |   |              |              |              |
| H | 6.328272000  | 2.556342000  | 0.989400000  |   |              |              |              |
| H | 2.056961000  | -2.273854000 | -1.018039000 |   |              |              |              |
| H | 0.507208000  | 6.088369000  | 0.539931000  |   |              |              |              |
| H | -0.862772000 | 5.303399000  | 1.337667000  |   |              |              |              |
| H | -1.137386000 | 6.378915000  | -0.037480000 |   |              |              |              |
| H | 1.151896000  | 5.412261000  | -1.868538000 |   |              |              |              |
| H | 0.250343000  | 4.128694000  | -2.685026000 |   |              |              |              |
| H | -0.519507000 | 5.698158000  | -2.380276000 |   |              |              |              |
| H | 7.447319000  | -2.372995000 | -1.908249000 |   |              |              |              |
| H | 7.963749000  | -3.890329000 | -1.146687000 |   |              |              |              |
| H | 6.255748000  | -3.619572000 | -1.515829000 |   |              |              |              |
| H | 6.460195000  | -3.165108000 | 2.233379000  |   |              |              |              |

## S8. References

1. M. Strohalm, D. Kavan, P. Novák, M. Volný and V. Havlíček, mMass 3: A Cross-Platform Software Environment for Precise Analysis of Mass Spectrometric Data, *Anal. Chem.*, 2010, **82**, 4648-4651.
2. M. J. Frisch, G. W. Trucks, H. B. Schlegel, G. E. Scuseria, M. A. Robb, J. R. Cheeseman, G. Scalmani, V. Barone, G. A. Petersson, H. Nakatsuji, X. Li, M. Caricato, A. V. Marenich, J. Bloino, B. G. Janesko, R. Gomperts, B. Mennucci, H. P. Hratchian, J. V. Ortiz, A. F. Izmaylov, J. L. Sonnenberg, Williams, F. Ding, F. Lipparini, F. Egidi, J. Goings, B. Peng, A. Petrone, T. Henderson, D. Ranasinghe, V. G. Zakrzewski, J. Gao, N. Rega, G. Zheng, W. Liang, M. Hada, M. Ehara, K. Toyota, R. Fukuda, J. Hasegawa, M. Ishida, T. Nakajima, Y. Honda, O. Kitao, H. Nakai, T. Vreven, K. Throssell, J. A. Montgomery Jr., J. E. Peralta, F. Ogliaro, M. J. Bearpark, J. J. Heyd, E. N. Brothers, K. N. Kudin, V. N. Staroverov, T. A. Keith, R. Kobayashi, J. Normand, K. Raghavachari, A. P. Rendell, J. C. Burant, S. S. Iyengar, J. Tomasi, M. Cossi, J. M. Millam, M. Klene, C. Adamo, R. Cammi, J. W. Ochterski, R. L. Martin, K. Morokuma, O. Farkas, J. B. Foresman and D. J. Fox, Gaussian 16 Rev. C.01. *Journal*, 2016.
3. T. Bruhn, A. Schaumlöffel, Y. Hemberger and G. Bringmann, SpecDis: quantifying the comparison of calculated and experimental electronic circular dichroism spectra, *Chirality*, 2013, **25**, 243-249.
4. M. D. Hanwell, D. E. Curtis, D. C. Lonie, T. Vandermeersch, E. Zurek and G. R. Hutchison, Avogadro: an advanced semantic chemical editor, visualization, and analysis platform, *J. Cheminformatics*, 2012, **4**, 17.
